1  
2  
3 **BONE MARROW STROMAL CELLS**  
4 **IN A MOUSE MODEL OF METAL IMPLANT OSSEOINTEGRATION**  
5  
6  
7  
8  
9

10 Alexander Vesprey<sup>1</sup>, Eun Sung Suh<sup>1</sup>, Didem Göz Aytürk<sup>1</sup>, Xu Yang<sup>1</sup>, Miracle Rogers<sup>1</sup>,  
11 Branden Sosa<sup>1</sup>, Yingzhen Niu<sup>1,2</sup>, Ivo Kalajzic<sup>3</sup>, Lionel B. Ivashkiv<sup>1,4</sup>, Mathias P.G. Bostrom<sup>1,5</sup>,  
12 Ugur M. Ayturk<sup>1</sup>  
13  
14  
15  
16  
17

18 <sup>1</sup>Hospital for Special Surgery, New York, NY, USA  
19

20 <sup>2</sup>Department of Joint Surgery, Hebei Medical University Third Affiliated Hospital, Shijiazhuang, China  
21

22 <sup>3</sup>Department of Genetics and Genome Sciences, University of Connecticut, Farmington, CT, USA  
23

24 <sup>4</sup>Departments of Medicine and Immunology, Weill Cornell Medical College, New York, NY, USA  
25

26 <sup>5</sup>Department of Orthopaedic Surgery, Weill Cornell Medical College, New York, NY, USA  
27  
28

29 **Keywords:** Osseointegration, Bone Marrow Stromal Cells, Single Cell RNA-seq  
30  
31  
32  
33

34 **Corresponding Author:**  
35

36 Ugur M. Ayturk, PhD  
37 Assistant Scientist  
38 Division of Musculoskeletal Integrity  
39 Hospital for Special Surgery  
40

41 Address: 535 East 70<sup>th</sup> St. S building, 4<sup>th</sup> floor  
42 New York, NY 10021

43 Phone: (212) 606-1459

44 Email: [ayturku@hss.edu](mailto:ayturku@hss.edu)

45 ORCID: 0000-0001-6625-2743  
46  
47

48 **ABSTRACT**

49 Metal implants are commonly used in orthopaedic surgery. The mechanical stability and  
50 longevity of implants depend on adequate bone deposition along the implant surface. The  
51 cellular and molecular mechanisms underlying peri-implant bone formation (i.e.  
52 osseointegration) are incompletely understood. Herein, our goal was to determine the specific  
53 bone marrow stromal cell populations that contribute to bone formation around metal implants.  
54 To do this, we utilized a mouse tibial implant model that is clinically representative of human  
55 joint replacement procedures. Using a lineage-tracing approach with the *Acta2.creERT2* and  
56 *Tmem100.creERT2* transgenic alleles, we found that *Pdgfra*- and *Ly6a/Scal*-expressing stromal  
57 cells (P $\alpha$ S cells) multiply and differentiate in the peri-implant environment to give rise to  
58 osteocytes in newly formed bone tissue. Single cell RNA-seq analysis indicated that P $\alpha$ S cells  
59 are quiescent in uninjured bone tissue; however, they express markers of proliferation and  
60 osteogenic differentiation shortly after implantation surgery. Our findings indicate that P $\alpha$ S cells  
61 are mobilized to repair bone tissue and facilitate implant osseointegration following surgery.  
62 Biologic therapies targeting P $\alpha$ S cells might improve osseointegration in patients undergoing  
63 orthopaedic procedures.

64

65

66

67

68

69

70

71

## 72 **INTRODUCTION**

73 More than 6 million orthopaedic surgeries are performed in the United States every year.  
74 Approximately 1 million of these are knee or hip replacement procedures, and the frequency of  
75 these surgeries is expected to increase by more than 70% over the next decade [1]. Yet, up to  
76 15% of patients undergoing joint replacement surgery develop complications and require  
77 complex and costly revision surgeries [2]. A leading cause of implant failure is aseptic loosening  
78 [2], which results from the inability of native bone tissue to sufficiently bond with the implant  
79 (i.e. osseointegration). An improved understanding of bone tissue's response to injury that occurs  
80 during joint replacement surgery, and of mechanisms that promote implant osseointegration,  
81 could help devise novel biologic therapies that will reduce implant failure.

82 Multiple stromal cell populations exist in the long bone marrow of the appendicular  
83 skeleton that could give rise to osteoprogenitor cells that participate in osseointegration [3, 4].  
84 One such population is identified by the expression of cell surface marker proteins PDGFRA and  
85 Sca1 (also referred to as P $\alpha$ S cells), and is predominantly located around arteriole-type blood  
86 vessels [5, 6]. P $\alpha$ S cells can be obtained from mouse long bone tissue with enzymatic digestion  
87 and fluorescence activated cell sorting. These cells can then be induced to differentiate to  
88 osteoblasts either in two-dimensional culture or following transplantation into irradiated host  
89 mice [5, 6]. Yet, unlike other perivascular stromal cell populations in the bone marrow [7, 8], the  
90 *in vivo* fate of P $\alpha$ S cells have not been determined during skeletal development or repair.

91 To determine the stromal cell populations involved in osseointegration, we used a  
92 previously developed mouse model of tibial implant surgery that mimics human joint  
93 replacement surgery (Figure 1a [9]). Following implant surgery, we performed lineage tracing

94 experiments using tamoxifen-inducible alleles, as well as bulk and single cell transcriptome  
95 sequencing. Herein, we report significant enrichment for P $\alpha$ S-lineage cells at the bone-implant  
96 interface and transcriptional changes during the early stages of post-surgical healing that suggest  
97 new strategies for enhancing osseointegration.

98

## 99 **METHODS**

### 100 ***Mice***

101 All experiments were approved by the Institutional Animal Care and Use Committee of Weill  
102 Cornell College of Medicine. C57/BL6J (Stock#: 000664), *Tg(Tmem100-*  
103 *EGFP/cre/ERT2)30Amc/J* (Stock#: 014159, hereafter referred to as *Tmem100.creERT2*) and  
104 *Gt(ROSA)26Sor<sup>tm14(CAG-tdTomato)Hze/J</sup>* (Stock#: 007914, hereafter referred to as  
105 *Ai14.R26.tdTomato*) mice were purchased from Jackson Laboratories (Bar Harbor, ME).  
106 *Acta2.creERT2* mice were previously described[10]. Using the aforementioned strains, we  
107 generated *Tmem100.creERT2*; *Ai14.R26.tdTomato* and *Acta2.creERT2*; *Ai14v.R26.tdTomato*  
108 mice for lineage tracing experiments. All mice were maintained in standard housing conditions,  
109 genotyped at 14 days and weaned at 21 days. To induce Cre-mediated recombination, we  
110 administered tamoxifen (Sigma cat#T5648, dissolved in corn oil) once to each mouse  
111 intraperitoneally, either at P10 (0.4mg) or at the time of implant surgery between 16-20 weeks of  
112 age (2mg). Mice were euthanized with exposure to CO<sub>2</sub> at the indicated time-points.

113

### 114 ***Tibial Implantation Surgery***

115 Surgeries were performed as previously described[9]. Briefly, mice were anesthetized with  
116 isoflurane inhalation. The fur around the right knee joint was shaved, and skin was sterilized

117 with betadine and chlorhexidine. Bupivacaine was injected subcutaneously for local anesthesia.  
118 An 8-mm midline incision was made over the knee. A medial para-patella incision was made to  
119 laterally dislocate the patella. The anterior cruciate ligament was excised, followed by the  
120 removal of both menisci and trimming of the tibial plateau. A hole was made by a 0.9-mm burr  
121 into the medullary canal through the tibial plateau. A 3D-printed titanium implant was press-fit  
122 into the hole. The joint was irrigated with PBS and the arthrotomy and the skin were closed with  
123 sutures. Mice received meloxicam (2mg/kg, immediately post-surgery) and buprenorphine  
124 (0.5mg/kg subcutaneously, every 12 hours for 3 days) for pain relief. Operated mice ambulate  
125 without obvious pain immediately after recovery from anesthesia. The implant articulates with  
126 femoral condyles and bears weight, similar to human joint replacements.

127

### 128 ***Bulk RNA-seq***

129 Tibial specimens with the implant were collected immediately after euthanasia and quickly  
130 cleaned of surrounding soft tissue. Each implant was gently removed with forceps, placed in an  
131 individual sterile plastic tube and snap-frozen in liquid nitrogen. Then, using a 1mm biopsy  
132 punch, metaphyseal cancellous bone was collected from each tibial specimen and transferred to  
133 an individual plastic tube to be frozen. Total RNA was extracted from individual peri-implant  
134 tissue and cancellous bone specimens with phenol-chloroform separation followed by on-column  
135 purification. Total RNA was then used in library preparation with the Illumina TruSeq Kit  
136 (Illumina, San Diego, CA). The libraries were sequenced on the Illumina HiSeq 4000 platform.  
137 Raw reads were mapped to the mouse genome with STAR [11] and analyzed with custom R  
138 scripts[12].

139

140 ***Flow Cytometry & Single Cell RNA-seq***

141 For evaluation of intact bone tissue, tibiae and femora from each mouse were removed at the  
142 indicated timepoints immediately after euthanasia. The epiphyses were cut with scissors, and  
143 marrow was flushed with centrifugation. For evaluation of surgically treated tibiae, the proximal  
144 half of the tibia was dissected (without disturbing the implant) and centrifuged to remove  
145 marrow. In both cases, the specimens were then collected in a sterile mortar inside a tissue-  
146 culture hood, gently crushed with a pestle, and transferred to a 15ml tube with 8ml collagenase  
147 solution (~4,000 units in  $\alpha$ MEM with 1% anti-mycotic; Type IV, Worthington Biochemical  
148 Corp, Lakewood, NJ). The solution containing the tissue fragments was then continuously  
149 agitated for 1 hour at 37°C. Cells were collected with centrifugation, re-suspended in  $\alpha$ MEM  
150 (with 10% FBS and 1% anti-mycotic) and then processed on an Aria II or Influx flow cytometer  
151 (BD Biosciences, San Jose, CA) to separate tdTomato-expressing (tdTom+) cells (with gates set-  
152 up with respect to negative control cells from tamoxifen-naïve mice). The sorted tdTom+ cells  
153 were then transferred to the 10X Chromium platform to be captured in oil droplets and barcoded  
154 with cell-specific oligonucleotides. Single cell RNA-seq libraries were prepared according to the  
155 manufacturer's instructions (10X Genomics, Pleasanton, CA) and sequenced on the Illumina  
156 HiSeq 4000 platform (Illumina, San Diego, CA). The sequencing data were processed with the  
157 Cellranger and Seurat (v3 [13]) data analysis pipelines. Trajectory analysis was performed with  
158 Monocle v2, using the standard semi-supervised algorithm[14]. Gene set enrichment analysis  
159 was performed using previously published and publicly available software [15].

160

161 ***Fluorescent Histology***

162 Following euthanasia, bone specimens were carefully removed and placed in ice-cold 4%  
163 paraformaldehyde, with gentle agitation at 4°C overnight. The specimens were washed with cold  
164 PBS and transferred to 0.5M EDTA for decalcification (for 2-4 days depending on the age of the  
165 mouse). The specimens were then incubated inside 30% sucrose until they sank. The implants  
166 were gently removed from the tibia with forceps, and the bone specimens were embedded in  
167 OCT. 20µm-thick sections were cut with a microtome (Leica Biosystems, Buffalo Grove, IL)  
168 and counter-stained with DAPI. The slides were imaged with a confocal microscope (LSM 880,  
169 Zeiss, Oberkochen, Germany) to collect images at 20 planes at 0.5µm distance from each other,  
170 using identical settings for each specimen. The fluorescent images were adjusted for brightness  
171 and contrast with Fiji/ImageJ.  $n \geq 3$  specimens were evaluated per group and timepoint in each  
172 experiment.

173

#### 174 ***Phalloidin Staining***

175 Frozen tissue sections were sequentially washed with PBS (20min), 0.3% Triton (15min), PBS  
176 (5min) at room temperature and stained with Alexa Fluor 488-conjugated phalloidin (Thermo  
177 Fisher, cat#A12379) overnight at 4°C. The next day, specimens were washed with PBS (3x,  
178 5min each), stained with DAPI (Sigma, cat#10236276001) for 10min, re-washed with PBS (2x,  
179 5min each), and mounted with coverslip. Specimens were stored at 4°C until imaging the  
180 following day.

181

#### 182 ***Hematoxylin-Eosin & Safranin-O Staining***

183 Tibial specimens were fixed in 10% formalin at room temperature for 4 hours and decalcified in  
184 0.5M EDTA for 4 days. The implants were removed with forceps and the bones were embedded

185 in paraffin. Each tissue block was sectioned at 7 $\mu$ m thickness, deparaffinized with xylene,  
186 rehydrated with ethanol, and incubated in hematoxylin and eosin or safranin O solutions. The  
187 slides were further washed with ethanol and xylene, mounted with a coverslip and imaged with a  
188 brightfield microscope (Eclipse 50i, Nikon, Tokyo, Japan).

189

### 190 *Fluorescence Activated Cell Sorting (FACS) of P $\alpha$ S Cells*

191 Cells were collected from hindlimb bone tissue as described under Flow Cytometry & Single  
192 Cell RNA-seq, resuspended in buffer solution (PBS + 2% FBS + 2mM EDTA) and blocked with  
193 recombinant Fc protein (1:100 dilution, BD Biosciences, cat#553142). Cells were then incubated  
194 with the primary antibody solution (1:100 dilution; PDGFRA-APC, Thermo Fisher, cat#17-  
195 1401-81; SCA1-FITC, Thermo Fisher, 11-5981-82; CD45-BV450, BD Biosciences, cat#560697;  
196 TER119-BV450, BD Biosciences, cat#560504; CD31-Pacific Blue, BioLegend, 102422; DAPI,  
197 Sigma, cat#10236276001) for 30 minutes on ice, washed with buffer solution and analyzed using  
198 the BD FACSCanto system (BD Biosciences, San Jose, CA). Specimens were analyzed in  
199 triplicate with at least 100,000 events per replicate.

200

## 201 **RESULTS**

### 202 *Acta2 expression marks stromal cells around metal implants in vivo.*

203 We performed bulk RNA-seq on peri-implant tissue and control cancellous bone tissue to  
204 identify transcripts that significantly differed between them. Tibial implants were inserted into  
205 16-week-old C57/BL6 male mice and removed 7-days later. We found significant differences in  
206 the abundances of 1173 transcripts (FDR<0.05, fold change>2), with 310 enriched in peri-  
207 implant tissue compared to cancellous bone. Within these 310 genes, we observed that *Acta2*



208 (encoding alpha smooth muscle actin, i.e.  $\alpha$ SMA) transcripts were enriched >3-fold (Figure 1b).  
209 Since increased *Acta2* expression has previously been reported during endochondral fracture  
210 healing in mouse long bones and *Acta2*-expressing cells can differentiate to osteoblasts and  
211 osteocytes [10, 16], we hypothesized that *Acta2*-expressing stromal cells are also involved in  
212 osseointegration. We tested this hypothesis by performing *Acta2*-lineage tracing. We generated  
213 *Acta2.creERT2;Ai14.R26.TdTomato* mice (i.e. *Acta2*-lineage reporter mice), performed tibial  
214 implant surgery at 20-weeks of age, administered a single tamoxifen dose at the end of surgery,  
215 and imaged the implanted and contralateral control tibiae for tdTomato expression 9 days later  
216 (Figure 1c). We observed abundant tdTom+ cells largely confined to the peri-implant area in the  
217 implanted tibia, and only a few tdTom+ cells on the control tibia (Figure 1c). We then repeated  
218 the experiment but evaluated tibial specimens 28-days after surgery. There remain a large  
219 number of tdTom+ cells in the implanted tibia, with many now appearing to have become  
220 osteocytes embedded in bone tissue, as indicated by phalloidin staining (Figure 1c). These results  
221 indicate that *Acta2*-expressing cells are progenitors for cells that participate in osseointegration.

222 To better characterize the *Acta2*-expressing cells, 9 days after surgery we recovered  
223 tdTom+ peri-implant cells from the *Acta2*-lineage reporter mice by sequential enzymatic  
224 digestion followed by flow cytometry, and subjected the sorted cells to single cell RNA-seq  
225 (Figure 1d). Pooling cells from n=4 implanted mouse tibiae enabled us to sequence the  
226 transcriptomes of n=4,397 cells. Clustering analysis identified 4 major groups of tdTom+ cells:  
227 Stromal cells (*Coll1a1*+, 48%), leukocytes (*Ptprc*/*Cd45*+, 37%), skeletal muscle cells (*Acta1*+,  
228 6%) and endothelial cells (*Pecam1*/*Cd31*+, 9%) (Figure 1e). Within the stromal cell clusters, the  
229 top 2 most abundant sub-populations (#1 and #2) together accounted for 64% of cells and  
230 expressed *Pdgfra* and *Sca1*, in addition to *Acta2* (Figure 1f).

231 *Pdgfra* and *Sca1* are expressed by a pericyte population (P $\alpha$ S cells) in the mouse bone  
232 marrow; these cells are capable of self-renewal and bone formation when cultured or  
233 transplanted to another mouse [6]. P $\alpha$ S cells are thought to be dormant during skeletal  
234 homeostasis [6], but their fate after skeletal injury has not been determined with lineage tracing.  
235 Because the P $\alpha$ S cells we identified in our model also express pro-osteogenic genes (such as  
236 *Runx2* and *Pth1r*) and other transcripts previously associated with fracture repair (such as *Acta2*  
237 and *Dkk3*), whereas P $\alpha$ S cells from uninjured bone tissue express these transcripts at very low or  
238 undetectable levels (as measured by bulk RNA-seq [17]), we decided to lineage trace P $\alpha$ S cells  
239 following tibial implant surgery. As *Acta2* expression is induced in P $\alpha$ S cells only during bone  
240 repair, the *Acta2.creERT2* transgenic mouse model cannot be used to efficiently label or modify  
241 P $\alpha$ S cells in uninjured bone tissue. We therefore searched for inducible Cre-expressing mouse  
242 strains that could be used to trace P $\alpha$ S cell activity *in vivo*, in the absence as well as presence of  
243 bone injury. Unfortunately, existing alleles associated with the principal markers of P $\alpha$ S cells  
244 were not suitable. *Pdgfra.creERT2* mice have poor recombination in long bone tissue [18].  
245 Similarly, *Sca1.MerCreMer* allele have poor recombination in the long bones and vertebrae  
246 ([19], Supplementary Figure 1). We therefore screened a single cell RNA-seq dataset we  
247 previously obtained using uninjured mouse endocortical long bones [20]) for other transcripts  
248 that may mark P $\alpha$ S cells. We found that the expression of *Tmem100* (encoding transmembrane  
249 protein 100, previously reported to be expressed by endothelial cells[21] and neurons[22]) is  
250 largely limited to *Pdgfra+* & *Sca1+* cells in endocortical bone (as well as a smaller number of  
251 osteoblasts, Supplementary Figure 2). Thus, *Tmem100*-expression may be used to label and trace  
252 P $\alpha$ S cells *in vivo*.

253

254 ***Postnatal *Tmem100.creERT2* expression marks P $\alpha$ S cells, osteoblasts and endothelial cells.***

255 To determine if we can utilize *Tmem100*-transgenic mice in studying P $\alpha$ S cells, we  
256 obtained BAC transgenic *Tmem100.creERT2* mouse (originally developed by Dr. Andrew  
257 McMahon) from Jackson Laboratory. We crossed male *Tmem100.creERT2* mice to female  
258 *Ai14v.R26.tdTomato* mice in order to generate *Tmem100*-lineage reporter mice. Before  
259 performing tibial implant surgery on *Tmem100*-lineage reporter mice, we characterized the  
260 specific skeletal cell populations in which *Tmem100*-transgene recombines upon tamoxifen  
261 administration. Following a single tamoxifen injection at P10, we evaluated tibial and spinal  
262 specimens at 3-, 8-, 30-, 120- and 180-days post-injection. We found extensive tdTom<sup>+</sup> cells  
263 along cortical bone surfaces (endosteum in particular) and the primary spongiosum 3-days later  
264 (Figure 2a and Supplementary Figure 3). We also gave *Tmem100*-lineage reporter mice a single  
265 dose of tamoxifen at P60 (data not shown) or P120 (Figure 3b); again, we observed tdTom<sup>+</sup> cells  
266 along bone-lining surfaces, indicating that the *Tmem100*-transgene is expressed by bone-lining  
267 cells in neonates and in adults. Interestingly, we were unable to detect GFP-expression with  
268 histology or flow cytometry.

269 To determine whether P $\alpha$ S cells were tdTom<sup>+</sup>, we separated P $\alpha$ S cells from the long  
270 bones of P13 mice (that received tamoxifen at P10) by flow cytometry (Pdgfra<sup>+</sup>, Sca1<sup>+</sup>, Cd45<sup>-</sup>,  
271 Cd31<sup>-</sup>, Ter119<sup>-</sup>) and found that >80% were tdTom<sup>+</sup> (Supplementary Figure 4); thus, *Tmem100*-  
272 transgene is expressed by most P $\alpha$ S cells in long bones. To determine which cell populations in  
273 addition to P $\alpha$ S cells express the *Tmem100*-transgene, we performed single cell RNA-seq on  
274 tdTom<sup>+</sup> cells recovered from long bones and vertebrae of *Tmem100*-lineage traced mice, at 3  
275 days and 120 days after tamoxifen injection at P10 (Figure 2b). Forty percent of all tdTom<sup>+</sup> cells  
276 were P $\alpha$ S cells. Other tdTom<sup>+</sup> cells included endothelial cells (*Pecam1/Cd31*<sup>+</sup>, *Emcn*<sup>+</sup>, 7%)

277 osteoblasts (*Bglap*<sup>+</sup>, 14%), leukocytes, and skeletal muscle cells (Figure 2c). The relative  
278 proportion of tdTom<sup>+</sup> cells that were P $\alpha$ S cells was comparable between long bone and spine  
279 specimens and did not change substantially between the 3-day and 120-day post-tamoxifen  
280 specimens. We detected high *Acta2*-expression in 2 small cell clusters (#9 and #11, Figure 2c-  
281 d); however, these cells did not express markers of P $\alpha$ S cells. Instead, their transcriptomes were  
282 consistent with those of smooth muscle cells (e.g., *Myh11*<sup>+</sup>, *Notch3*<sup>+</sup>, *Tagln*<sup>+</sup>)[23, 24] (Figure  
283 2d).

284 Notably, we detected cells matching the transcriptional profile of *Cxcl12*-abundant reticular cells  
285 (i.e. CAR cells) 120-days post-tamoxifen injection, but not at 3-days (Figure 2c). Consistent with  
286 this observation, starting at 30-days post-tamoxifen injection, we detected tdTom<sup>+</sup> cells with  
287 reticular morphology around bone marrow sinusoids (Supplementary Figure 3). Taken together,  
288 our data indicate *Tmem100.creERT2* is expressed in multiple cell types with P $\alpha$ S cells being the  
289 most common cell type in bone. Therefore, *Tmem100.creERT2* mice can be used to lineage-  
290 trace P $\alpha$ S cells *in vivo*.

291

### 292 ***Post-surgical P $\alpha$ S cell activation is associated with significant transcriptional changes.***

293 To identify the changes in P $\alpha$ S cell transcriptome during implant osseointegration, we  
294 performed tibial implant surgery on *Tmem100*-lineage reporter mice, and compared surgically  
295 implanted tibial specimens to uninjured (control) tibiae. We first determined whether the timing  
296 of tamoxifen injection influences the spatial distribution of tdTom<sup>+</sup> cells in the peri-implant area.  
297 We pulsed one group of mice with tamoxifen at P10 and performed surgery on them 4 months  
298 later, whereas we kept another group of mice tamoxifen-naïve and pulsed them with tamoxifen at  
299 the end of surgery at 4 months of age (Figure 3a-b). Nine-days post-surgery, we observed that

300 peri-implant cells in both groups of mice were tdTom+, indicating that cell-type-specific  
301 Tmem100-transgene expression patterns are similar at P10 and P120.

302 We next collected tdTom+ cells from the surgically treated tibiae and intact tibiae of mice  
303 (separately pooled from n=4 mice) treated with tamoxifen after surgery, and performed single  
304 cell RNA-seq (Figure 3c). As expected, P $\alpha$ S cells were abundantly present in the collective  
305 single cell RNA-seq data, however cells from implanted and surgery-naïve control tibiae  
306 separated into distinct clusters, indicating significant differences between their transcriptomes.  
307 The tdTom+ cells retrieved from implanted tibiae contained P $\alpha$ S cells (clusters #3, #4 and #0)  
308 that expressed markers of proliferation (e.g. *Mki67* in cluster #3) and osteogenic differentiation  
309 (e.g. *Runx2*) whereas those from the control tibiae (cluster #7) did not (Figure 3d-e). To  
310 determine the transcriptome-wide differences between P $\alpha$ S cells from implanted and control  
311 tibiae, we compared the cells in clusters #4 and #0 with those in cluster #7, using Seurat's  
312 FindMarkers function [25]. We found that 647 genes were differentially expressed, with 498  
313 upregulated and 149 downregulated genes in both clusters #0 and #4, compared to #7 (adjusted  
314 p<0.05, Supplementary Table 1). The upregulated genes included *Colla1*, *Colla2*, *Runx2*, *Pth1r*,  
315 *Ibsp* and *Spp1* (Figure 3e), altogether suggesting that P $\alpha$ S cells differentiate towards an  
316 osteogenic fate following tibial implant surgery. To further confirm this, we performed a  
317 trajectory analysis of all P $\alpha$ S cells (clusters #0, #3, #4 and #7) and osteoblasts (cluster #6).  
318 Monocle positioned quiescent P $\alpha$ S cells from control tibiae and osteoblasts from both groups of  
319 tibiae at the opposite ends of the pseudotime spectrum (Supplementary Figure 5). However, P $\alpha$ S  
320 cells from the implanted tibia were positioned along the trajectory that connects the  
321 aforementioned cell types (Supplementary Figure 5), further indicating that implant surgery  
322 induces differentiation of dormant P $\alpha$ S Cells.

323 To determine if the differences between quiescent and surgery-activated P $\alpha$ S cells might  
324 be indicative of specific molecular processes, we performed a gene set enrichment analysis  
325 (GSEA). We found significant changes in multiple sets of genes related to cellular differentiation  
326 and stress (e.g. epithelial-mesenchymal transition, unfolded protein response), metabolism (e.g.  
327 glycolysis), immunity (e.g. Tnfa-signaling) and development (e.g. angiogenesis) (Figure 3f) as a  
328 result of implant surgery. When we evaluated known transcription factors that might be involved  
329 in activation of quiescent P $\alpha$ S cells, we observed increased expression of 22 transcripts  
330 (including multiple factors previously associated with skeletogenesis, such as *Creb3l1*[26],  
331 *Ctnnb1*[27], *Nr4a2*[28], *Runx1*[29], *Sox4*[30] and *Sox9*[31], in addition to *Runx2*[32]), as well  
332 as decreased expression of 13 transcripts (including *Ebf1*[33], *Id3*[34] and *Tsc22d3*[35]) in  
333 clusters #0 and #4 (Figure 3g). These results indicate that tibial implant surgery induces a highly  
334 diverse set of transcriptional changes in P $\alpha$ S cells in addition to induction of differentiation.

335

## 336 **DISCUSSION**

337 Peri-articular titanium implants are commonly utilized in orthopaedic procedures, such as  
338 total knee and hip joint replacements. Robust osseointegration is critical to the longevity of these  
339 implants. However, the molecular and cellular mechanisms of osseointegration are unclear. Here,  
340 we show that the insertion of a titanium implant into the mouse tibia activates P $\alpha$ S cells in the  
341 peri-implant region. While P $\alpha$ S cells are quiescent in uninjured bone, our data indicate that these  
342 cells proliferate and undergo osteogenic differentiation in newly formed peri-implant bone tissue  
343 (summarized in our model in Supplementary Figure 6). We also find that the activation of P $\alpha$ S  
344 cells is associated with a transcriptional signature that includes increased expression of osteo-  
345 anabolic, metabolic, stress-induced and immunity-related genes (Figure 3f). One interesting

346 increase involves *Pth1r* (encoding parathyroid hormone receptor), whose expression was not  
347 observed in dormant P $\alpha$ S cells. Whether implant surgery-activated P $\alpha$ S cells are more  
348 responsive to parathyroid hormone (PTH) therapy requires formal testing. However, consistent  
349 with this hypothesis, PTH treatment has previously been shown to significantly increase the  
350 biomechanical strength of bone-implant interface in our model[9].

351 Additional molecular mechanisms that follow P $\alpha$ S cell-activation still need to be  
352 delineated. Intriguingly, one transcription factor that is downregulated in implant-activated P $\alpha$ S  
353 cells is Early B cell factor, *Ebfl*. EBF1 is a negative regulator of bone mass [33, 36, 37].  
354 However, the cell types responsible for this phenotype has not been identified, as conditional  
355 deletion of *Ebfl* with *Lepr-Cre* or *Runx2-cre* did not alter bone properties[36, 37] , whereas  
356 global or *Prrx1-Cre*-mediated deletion of *Ebfl* increased trabecular bone mass [33, 38]. It will  
357 be important to determine if conditional inactivation of *Ebfl* in P $\alpha$ S cells leads to improved bone  
358 properties.

359 Quiescent P $\alpha$ S cells do not express the *Acta2* transcript at levels detectable by single cell  
360 RNA-seq (Figure 3d). Our data indicate that implant surgery leads to *Acta2.creERT2* expression  
361 in P $\alpha$ S cells. Our findings are consistent with reports that performed *Acta2*-lineage-tracing in  
362 other models of bone repair, such as endochondral fracture healing [10, 16] and anterior cruciate  
363 ligament reconstruction [39]. Thus, *Acta2* expression is highly dynamic in healing bone tissue  
364 and is induced in P $\alpha$ S cells immediately after injury.

365 Because *Acta2.creERT2* expression occurs after P $\alpha$ S have been activated, our discovery  
366 that *Tmem100.CreERT2* expression precedes or is contemporaneous with P $\alpha$ S formation  
367 provides a new tool for manipulating P $\alpha$ S cells *in vivo*. *Tmem100.CreERT2* is expressed in P $\alpha$ S  
368 cells and osteoblasts; therefore, this transgene may not be appropriate for developmental



369 osteogenic fate-mapping studies. Nevertheless, *Tmem100.CreERT2* is expressed in a large  
370 fraction of P $\alpha$ S cells and could be used to temporally modify these cells. Moreover, the single  
371 cell RNA-seq data we generated suggests there are other markers that can be used to define P $\alpha$ S  
372 cells and distinguish quiescent cells from implant-activated ones (Supplementary Table 1). These  
373 additional markers are particularly important since *Ly6a*, which encodes Sca1, does not have a  
374 known human ortholog. Therefore, while mice have P $\alpha$ S cells, their human counterpart remains  
375 to be identified. In this regard, *Cd248* (which encodes the transmembrane protein endosialin) is  
376 one candidate marker that warrants follow-up. Endosialin expression was restricted to P $\alpha$ S cells  
377 in our long bone single cell RNAseq data. In other tissues endosialin expression has been  
378 observed in pericytes found in fat, aorta and synovium, and can be utilized for prospective  
379 isolation of stromal cells with flow cytometry [40]. Humans have a CD248 ortholog.

380 One intriguing outcome of our experiments is the identification of tdTom<sup>+</sup> CAR cells in  
381 the bone marrow not immediately after tamoxifen injection at P10, but starting at 30-days and  
382 later time-points (Figure 2c and Supplementary Figure 3). These data suggest the possibility that  
383 P $\alpha$ S cells may give rise to CAR cells, as arteriole-type large blood vessels (surrounded by  
384 pericytes including P $\alpha$ S cells) sprout sinusoids (surrounded by CAR cells) during the  
385 development of marrow vasculature[41]. Yet, similar observations have been reported with the  
386 *Sp7.CreERT2* mouse model[42], wherein early postnatal labeling of *Sp7.Cre*-expressing cells  
387 results in the labeling of CAR cells later on. The degree of overlap between the cells targeted by  
388 *Tmem100.CreERT2* and *Sp7.CreERT2* mouse models remains unclear. However, Cre-  
389 recombination in CAR cells has been reported in other congenitally activated mouse models,  
390 such as *Bglap.Cre* and *Dmpl.Cre* [43]. Therefore, it is also possible that a small number of  
391 tdTom<sup>+</sup> CAR cells at P10 in *Tmem100*-lineage reporter mice are capable of proliferation (as



392 suggested by Seike et al.,[36]), in order to give rise to a larger number of CAR cells later on.  
393 Development of novel mouse models with P $\alpha$ S cell-specific recombination profiles will likely  
394 provide the definitive answer.

395 In summary, we have discovered that quiescent P $\alpha$ S cells are induced to proliferate and  
396 differentiate during metal implant osseointegration in mice. Importantly, our data demonstrate  
397 the utility of scRNA-seq in understanding the plasticity of discrete cell populations (and  
398 identifying pertinent markers to guide orthogonal experiments) during bone healing; these  
399 studies would not be possible with tissue-level RNA-seq alone. Understanding how P $\alpha$ S cells  
400 promote osseointegration whether they are necessary and sufficient for this process should lead  
401 to new strategies for enhancing osseointegration in humans, thereby reducing the incidence of  
402 implant failure following joint replacement surgery.

403

#### 404 **AUTHOR CONTRIBUTIONS**

405 XY, LBI, MPGB and UMA conceived the experiments. AV, ESS, DGA, XY, MR, BS, YN and  
406 UMA performed data acquisition and analysis. ESS, DGA, XY, IK, LBI, MPGB and UMA  
407 contributed to data interpretation. All authors reviewed and approved the final version of the  
408 manuscript.

409

#### 410 **ACKNOWLEDGMENTS**

411 This study was supported by Hospital for Special Surgery institutional funds, and additional  
412 funds provided by the Tow Foundation for the David Z. Rosenzweig Genomics Center at HSS.  
413 The authors thank Drs. Matthew Greenblatt, Noriaki Ono, Henry Kronenberg and Matthew  
414 Warman for thoughtful comments.

415

416 **REFERENCES**

- 417 1. Sloan, M., A. Premkumar, and N.P. Sheth, *Projected Volume of Primary Total Joint Arthroplasty*  
418 *in the U.S., 2014 to 2030*. J Bone Joint Surg Am, 2018. **100**(17): p. 1455-1460.
- 419 2. *2017 Annual Report*, in *American Joint Replacement Registry 2017*.
- 420 3. Ono, N. and H.M. Kronenberg, *Bone repair and stem cells*. Curr Opin Genet Dev, 2016. **40**: p.  
421 103-107.
- 422 4. Sugiyama, T., Y. Omatsu, and T. Nagasawa, *Niches for hematopoietic stem cells and immune cell*  
423 *progenitors*. Int Immunol, 2019. **31**(1): p. 5-11.
- 424 5. Houlihan, D.D., et al., *Isolation of mouse mesenchymal stem cells on the basis of expression of*  
425 *Sca-1 and PDGFR-alpha*. Nat Protoc, 2012. **7**(12): p. 2103-11.
- 426 6. Morikawa, S., et al., *Prospective identification, isolation, and systemic transplantation of*  
427 *multipotent mesenchymal stem cells in murine bone marrow*. J Exp Med, 2009. **206**(11): p. 2483-  
428 96.
- 429 7. Matsushita, Y., et al., *A Wnt-mediated transformation of the bone marrow stromal cell identity*  
430 *orchestrates skeletal regeneration*. Nat Commun, 2020. **11**(1): p. 332.
- 431 8. Zhong, L., et al., *Single cell transcriptomics identifies a unique adipose lineage cell population*  
432 *that regulates bone marrow environment*. Elife, 2020. **9**.
- 433 9. Yang, X., et al., *Intermittent Parathyroid Hormone Enhances Cancellous Osseointegration of a*  
434 *Novel Murine Tibial Implant*. J Bone Joint Surg Am, 2015. **97**(13): p. 1074-83.
- 435 10. Grcevic, D., et al., *In vivo fate mapping identifies mesenchymal progenitor cells*. Stem Cells, 2012.  
436 **30**(2): p. 187-96.
- 437 11. Dobin, A., et al., *STAR: ultrafast universal RNA-seq aligner*. Bioinformatics, 2013. **29**(1): p. 15-21.
- 438 12. Kedlaya, R., et al., *Sclerostin inhibition reverses skeletal fragility in an Lrp5-deficient mouse*  
439 *model of OPPG syndrome*. Sci Transl Med, 2013. **5**(211): p. 211ra158.
- 440 13. Butler, A., et al., *Integrating single-cell transcriptomic data across different conditions,*  
441 *technologies, and species*. Nat Biotechnol, 2018. **36**(5): p. 411-420.
- 442 14. Qiu, X., et al., *Single-cell mRNA quantification and differential analysis with Census*. Nat  
443 Methods, 2017. **14**(3): p. 309-315.
- 444 15. Subramanian, A., et al., *Gene set enrichment analysis: a knowledge-based approach for*  
445 *interpreting genome-wide expression profiles*. Proc Natl Acad Sci U S A, 2005. **102**(43): p. 15545-  
446 50.
- 447 16. Matthews, B.G., et al., *Analysis of alphaSMA-labeled progenitor cell commitment identifies notch*  
448 *signaling as an important pathway in fracture healing*. J Bone Miner Res, 2014. **29**(5): p. 1283-  
449 94.
- 450 17. Helbling, P.M., et al., *Global Transcriptomic Profiling of the Bone Marrow Stromal*  
451 *Microenvironment during Postnatal Development, Aging, and Inflammation*. Cell Rep, 2019.  
452 **29**(10): p. 3313-3330 e4.
- 453 18. Zhou, B.O., et al., *Leptin-receptor-expressing mesenchymal stromal cells represent the main*  
454 *source of bone formed by adult bone marrow*. Cell Stem Cell, 2014. **15**(2): p. 154-68.
- 455 19. Vagnozzi, R.J., et al., *Genetic Lineage Tracing of Sca-1(+) Cells Reveals Endothelial but Not*  
456 *Myogenic Contribution to the Murine Heart*. Circulation, 2018. **138**(25): p. 2931-2939.
- 457 20. Ayturk, U.M.S., J. P.; Vesprey, A.; Jacobsen, C. M.; Divieti Pajevic, P.; Warman, M. L., *Single cell*  
458 *RNA sequencing of calvarial and long bone endocortical cells*. 2019: bioRxiv.
- 459 21. Somekawa, S., et al., *Tmem100, an ALK1 receptor signaling-dependent gene essential for arterial*  
460 *endothelium differentiation and vascular morphogenesis*. Proc Natl Acad Sci U S A, 2012.  
461 **109**(30): p. 12064-9.

- 462 22. Weng, H.J., et al., *Tmem100 Is a Regulator of TRPA1-TRPV1 Complex and Contributes to*  
463 *Persistent Pain*. *Neuron*, 2015. **85**(4): p. 833-46.
- 464 23. Baryawno, N., et al., *A Cellular Taxonomy of the Bone Marrow Stroma in Homeostasis and*  
465 *Leukemia*. *Cell*, 2019. **177**(7): p. 1915-1932 e16.
- 466 24. Tikhonova, A.N., et al., *The bone marrow microenvironment at single-cell resolution*. *Nature*,  
467 2019. **569**(7755): p. 222-228.
- 468 25. Satija, R., et al., *Spatial reconstruction of single-cell gene expression data*. *Nat Biotechnol*, 2015.  
469 **33**(5): p. 495-502.
- 470 26. Murakami, T., et al., *Signalling mediated by the endoplasmic reticulum stress transducer OASIS is*  
471 *involved in bone formation*. *Nat Cell Biol*, 2009. **11**(10): p. 1205-11.
- 472 27. Day, T.F., et al., *Wnt/beta-catenin signaling in mesenchymal progenitors controls osteoblast and*  
473 *chondrocyte differentiation during vertebrate skeletogenesis*. *Dev Cell*, 2005. **8**(5): p. 739-50.
- 474 28. Lee, M.K., et al., *Regulation of osteoblast differentiation by Nurr1 in MC3T3-E1 cell line and*  
475 *mouse calvarial osteoblasts*. *J Cell Biochem*, 2006. **99**(3): p. 986-94.
- 476 29. Lian, J.B., et al., *Runx1/AML1 hematopoietic transcription factor contributes to skeletal*  
477 *development in vivo*. *J Cell Physiol*, 2003. **196**(2): p. 301-11.
- 478 30. Nissen-Meyer, L.S., et al., *Osteopenia, decreased bone formation and impaired osteoblast*  
479 *development in Sox4 heterozygous mice*. *J Cell Sci*, 2007. **120**(Pt 16): p. 2785-95.
- 480 31. Akiyama, H., et al., *Osteo-chondroprogenitor cells are derived from Sox9 expressing precursors*.  
481 *Proc Natl Acad Sci U S A*, 2005. **102**(41): p. 14665-70.
- 482 32. Takarada, T., et al., *Genetic analysis of Runx2 function during intramembranous ossification*.  
483 *Development*, 2016. **143**(2): p. 211-8.
- 484 33. Hesslein, D.G., et al., *Ebf1-dependent control of the osteoblast and adipocyte lineages*. *Bone*,  
485 2009. **44**(4): p. 537-46.
- 486 34. Maeda, Y., et al., *Inhibitory helix-loop-helix transcription factors Id1/Id3 promote bone formation*  
487 *in vivo*. *J Cell Biochem*, 2004. **93**(2): p. 337-44.
- 488 35. Lekva, T., et al., *The glucocorticoid-induced leucine zipper gene (GILZ) expression decreases after*  
489 *successful treatment of patients with endogenous Cushing's syndrome and may play a role in*  
490 *glucocorticoid-induced osteoporosis*. *J Clin Endocrinol Metab*, 2010. **95**(1): p. 246-55.
- 491 36. Seike, M., et al., *Stem cell niche-specific Ebf3 maintains the bone marrow cavity*. *Genes Dev*,  
492 2018. **32**(5-6): p. 359-372.
- 493 37. Zee, T., et al., *The transcription factor early B-cell factor 1 regulates bone formation in an*  
494 *osteoblast-nonautonomous manner*. *FEBS Lett*, 2013. **587**(6): p. 711-6.
- 495 38. Derecka, M., et al., *EBF1-deficient bone marrow stroma elicits persistent changes in HSC*  
496 *potential*. *Nat Immunol*, 2020. **21**(3): p. 261-273.
- 497 39. Kamalidinov, T.B., et al., *Amplifying Bone Marrow Progenitors Expressing alpha-Smooth Muscle*  
498 *Actin Produce Zonal Insertion Sites During Tendon-to-Bone Repair*. *J Orthop Res*, 2019.
- 499 40. Hasanov, Z., et al., *Endosialin Promotes Atherosclerosis Through Phenotypic Remodeling of*  
500 *Vascular Smooth Muscle Cells*. *Arterioscler Thromb Vasc Biol*, 2017. **37**(3): p. 495-505.
- 501 41. Kusumbe, A.P., S.K. Ramasamy, and R.H. Adams, *Coupling of angiogenesis and osteogenesis by a*  
502 *specific vessel subtype in bone*. *Nature*, 2014. **507**(7492): p. 323-328.
- 503 42. Mizoguchi, T., et al., *Osterix marks distinct waves of primitive and definitive stromal progenitors*  
504 *during bone marrow development*. *Dev Cell*, 2014. **29**(3): p. 340-9.
- 505 43. Zhang, J. and D.C. Link, *Targeting of Mesenchymal Stromal Cells by Cre-Recombinase Transgenes*  
506 *Commonly Used to Target Osteoblast Lineage Cells*. *J Bone Miner Res*, 2016. **31**(11): p. 2001-  
507 2007.



510 **FIGURE LEGENDS**

511 Figure 1: *Acta2*-lineage cells populate the peri-implant area following tibial implantation  
512 surgery. (a) Faxitron, microCT, hematoxylin & eosin (H&E)- and safranin O-stained images of  
513 the implanted mouse tibia are depicted (from left to right). Both microCT and H&E images  
514 indicate bone formation around the implant, while red safranin O-staining indicates lack of  
515 cartilage formation in the peri-implant area. (b) Bulk RNA-seq of peri-implant tissue from  
516 implanted tibiae indicates a significant increase in *Acta2* expression relative to cancellous bone 7  
517 days post-surgery. (c) Implant surgery was performed on *Acta2*-lineage reporter mice at 20  
518 weeks of age, with one-time tamoxifen injection immediately post-surgery. Nine days later, flat  
519 and elongated cells in the immediate vicinity of the implant are tdTom<sup>+</sup>, whereas little to no  
520 tdTomato expression was detected in the surgery-naïve control tibia (white scale bar: 500µm,  
521 yellow scale bar: 50µm). Twenty-eight days later, relatively less tdTomato expression is  
522 observed, but high magnification imaging of phalloidin-stained sections reveal tdTom<sup>+</sup>  
523 osteocytes in the peri-implant environment (Representative images of n=3 mice/group depicted.).  
524 (d) Nine days post-surgery, tdTom<sup>+</sup> cells from implanted tibiae were purified with flow  
525 cytometry and analyzed with single cell RNA-seq. Stromal, immune, muscle and endothelial cell  
526 populations were identified. (e) Stromal cells constituted the largest tdTom<sup>+</sup> cell group, while  
527 the majority of them (64%) were Pdgfra<sup>+</sup> & Sca1<sup>+</sup> (PαS) cells. (f) Heatmaps of gene expression  
528 indicate distinct markers for each cell population. *Acta2*, *Pdgfra* and *Ly6a/Sca1* are co-expressed  
529 by the majority of stromal cells. Lower levels of *Runx2* expression is also detectable in the same  
530 group of cells.

531

532 Figure 2: *Tmem100.creERT2* transgene labels P $\alpha$ S cells in the developing skeleton. (a)  
533 *Tmem100*-lineage reporter mice were injected with tamoxifen at P10 and evaluated at 3-, 8-, 30-,  
534 120- and 180-day time points post-injection. The proportion of tdTom<sup>+</sup> osteocytes in the  
535 diaphyseal cortex increased over time (Representative images of  $n \geq 3$  mice/group depicted. White  
536 scale bar: 500 $\mu$ m, yellow scale bar: 100 $\mu$ m). (b) Single cell RNA-seq of tdTom<sup>+</sup> cells at 3- and  
537 120-days indicates that approximately 40% of labeled cells are P $\alpha$ S cells (represented by clusters  
538 #0 and #1) at both time-points. (c) The transcriptional diversity of *Tmem100*-lineage cells were  
539 similar at 3- and 120-days post-injection, with some differences. >20% of the cells detected at  
540 120-days were contaminating skeletal muscle cells; these cells were not captured at the 3-day  
541 timepoint. *Cxcl12*-abundant reticular (CAR) cells are also observed at 120-days but not at 3-days  
542 post-injection. (d) Violin plots depict the expression of cluster-specific markers. Clusters #0, #1  
543 and #10 co-express *Pdgfra* and *Ly6a/Sca1*, whereas clusters #9 and #11 express *Acta2*, likely  
544 representing smooth muscle cells.

545  
546 Figure 3: Implantation surgery on *Tmem100*-lineage reporter mice results in labeling of peri-  
547 implant cells similar to *Acta2*-lineage reporter mice. (a) *Tmem100*-lineage reporter mice were  
548 subjected to tibial implantation surgery at 4 months. (b) Mice were injected with tamoxifen  
549 either at P10 (left) or at the time of surgery. Regardless of the timing of tamoxifen treatment,  
550 peri-implant cells were labeled with tomato expression (Representative images of  $n \geq 3$   
551 mice/group depicted. Scale bar: 500 $\mu$ m). (c) tdTom<sup>+</sup> cells were purified from the implanted or  
552 surgery-naïve tibiae of mice treated with tamoxifen at surgery and evaluated with single cell  
553 RNA-seq. Clusters #0, #3, #4 and #7 were found to express markers of P $\alpha$ S cells. (d) Pie charts  
554 indicate little overlap between the P $\alpha$ S cells originating from implanted and surgery-naïve tibiae

555 of *Tmem100*-lineage reporter mice. (e) Violin plots show that P $\alpha$ S cells collected from  
556 implanted tibiae express *Acta2*, *Runx2* and high levels of *Col1a1*, whereas the cells from  
557 surgery-naïve tibiae do not. (f) Gene set enrichment analysis (GSEA) identified significant  
558 enrichment for multiple groups of genes, when clusters #0 and #4 are separately compared to #7.  
559 Gene sets that are significantly enriched in both comparisons (FDR<0.05) are highlighted in  
560 bold. (g) Heatmap of transcription factors with significant changes in expression across clusters  
561 associated with P $\alpha$ S cells.

562

### 563 **SUPPLEMENTARY DATA**

564 Supplementary Figure 1: We tested the recombination efficiency of the *Sca1.MerCreMer* knock-  
565 in mouse model in the tibia and lumbar spine. (a) *Sca1*-lineage reporter mice were injected with  
566 tamoxifen at P11, and sacrificed 2 days later. Flow cytometry did not identify a meaningful  
567 number of tdTom<sup>+</sup> cells among cells collected from tibial and femoral bone specimens (data not  
568 shown). Histologic analysis depicted tdTomato-labeling of little to no cells in the tibia (b) and  
569 spine (c).

570

571 Supplementary Figure 2: Single cell RNA-seq data derived from uninjured endocortical mouse  
572 cells depict cell-type specific expression of marker genes (Ayturk et al.,  
573 [doi.org/10.1101/849224](https://doi.org/10.1101/849224)). *Pdgfra* and *Ly6a/Sca1* expression is specific to cluster #6, whereas  
574 *Acta2* expression in intact mouse bone is specific to a cell population (cluster #19) that also  
575 expresses *Notch3* and *Mustn1*, but not *Pdgfra* or *Ly6a*. *Tmem100* expression is largely limited to  
576 cluster #6; these cells also co-express P $\alpha$ S cell markers *Pdgfra* and *Ly6a/Sca1* (aSMA: alpha-  
577 smooth muscle actin; CAR: Cxcl12-abundant reticular cell).

578

579 Supplementary Figure 3: *Tmem100*.creERT2 transgene expression comprehensively marks a  
580 multitude of skeletal tissues in mice. (a) Cells lining the anterior cruciate ligament and meniscus  
581 are tdTom+ 3-days after tamoxifen injection at P10. (b) Morphologically distinct tdTom+  
582 marrow cells appear at 30-days primarily around the sinusoid-type blood vessels in tibia,  
583 suggesting that these cells might be Cxcl12-abundant reticular (CAR) stromal cells. (c) Time-  
584 dependent tdTomato-expression patterns observed in the tibia are consistent with those in the  
585 lumbar vertebrae. Trabecular and cortical bone surfaces are comprehensively labeled at 3-days,  
586 whereas tdTomato-expression is rather limited to osteocytes and growth plate chondrocytes at  
587 120- and 180-days. Nucleus pulposus is consistently labeled with tdTomato-expression at all  
588 time points.

589

590 Supplementary Figure 4: Representative FACS plots indicate that the majority of P $\alpha$ S cells are  
591 tdTom+ in *Tmem100*-lineage reporter mice. Live, single cells are gated based on forward and  
592 side scatter. Lineage- (CD45-, CD31-, TER119-) cells are evaluated based on PDGFRA-APC  
593 and SCA1-FITC fluorescence. tdTom+ portion of PDGFRA+ & SCA1+ cells are determined  
594 based on PE-fluorescence.

595

596 Supplementary Figure 5: Trajectory analysis with Monocle positions active P $\alpha$ S cells between  
597 dormant P $\alpha$ S cells and osteoblasts. (a) Clusters representing P $\alpha$ S cells (#0, 3, 4 and 7) and  
598 osteoblasts (#6), as identified by Seurat were subjected to trajectory analysis with Monocle. (b)  
599 Cells representing dormant P $\alpha$ S cells from uninjured control tibiae are positioned at the  
600 beginning of pseudotime, whereas osteoblasts from both control and implanted tibiae are



601 positioned at the end of pseudotime. P $\alpha$ S cells from implanted tibiae that are presumably  
602 differentiating are scattered across the pseudotime trajectory, between dormant P $\alpha$ S cells and  
603 osteoblasts. (c) Representative transcripts that mark distinct stages of pseudotime are indicated in  
604 violin (left) scatter (center) and trajectory (right) plots in each panel. *Clec3b* expression marks  
605 the dormant P $\alpha$ S cells positioned at the beginning of pseudotime, whereas *Acta2* and *Mki67*  
606 expression marks active P $\alpha$ S cells positioned along the transitional path and *Bglap* expression  
607 marks osteoblasts at the end of pseudotime.

608

609 Supplementary Figure 6: Model of P $\alpha$ S cell activation after tibial implant surgery. P $\alpha$ S cells  
610 begin to proliferate and differentiate following implant surgery. They exhibit a fibroblast-like  
611 morphology and express *Acta2*, *Runx2* and *Pth1r* at 9-days, whereas a subset of them go on to  
612 become osteocytes in newly formed peri-implant bone at 28-days.

613

614 Supplementary Table 1: Differential gene expression analysis of active and quiescent P $\alpha$ S cells  
615 reveals significant differences in 647 genes (adjusted  $p < 0.05$ ).

616

617

618

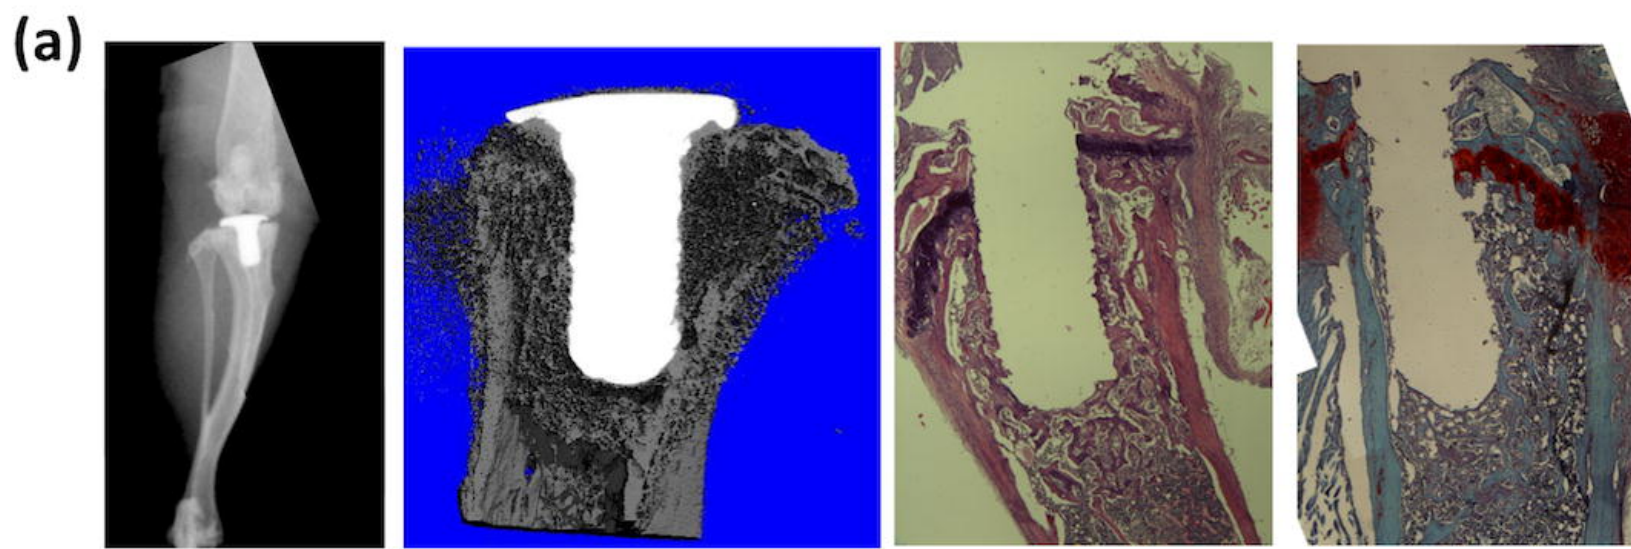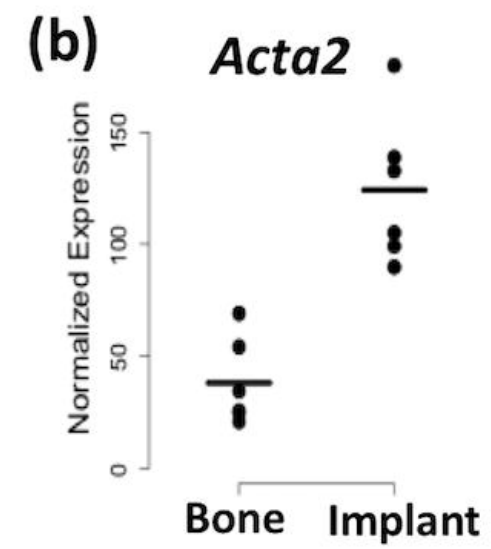

(c) 9 Days Post-Surgery

28 Days Post-Surgery

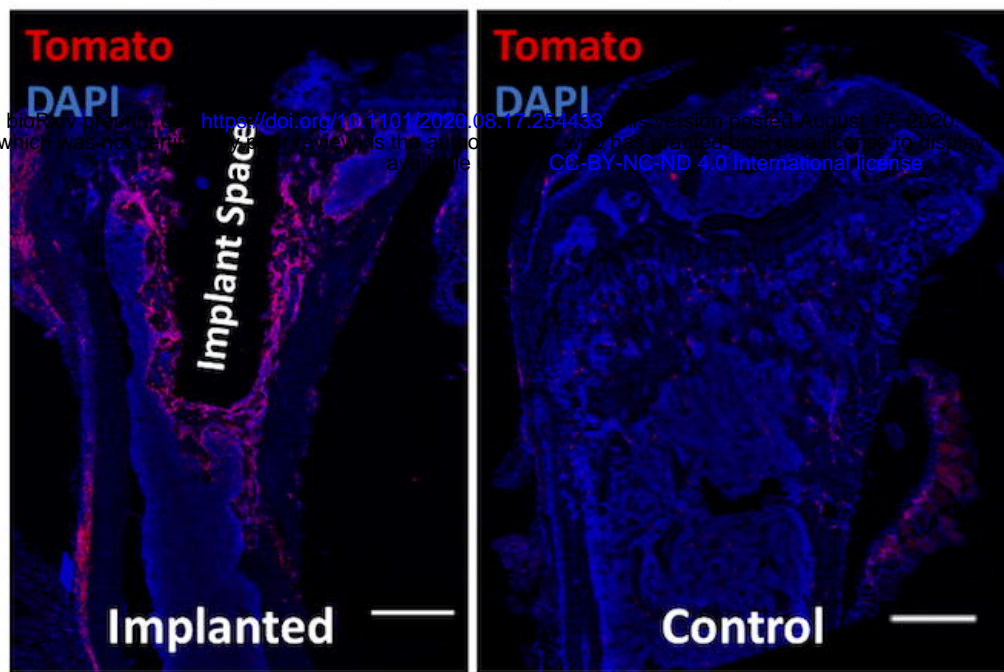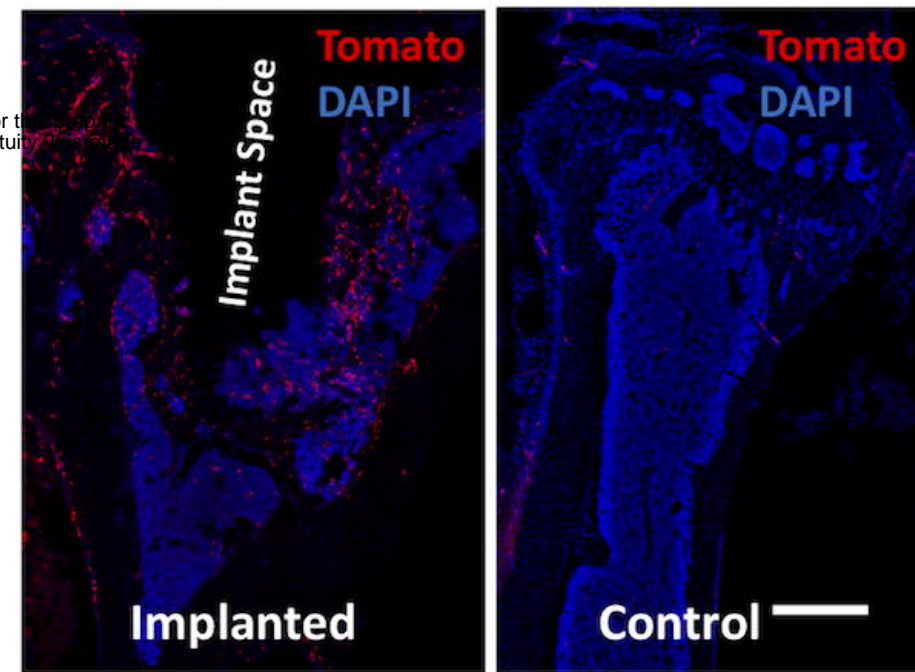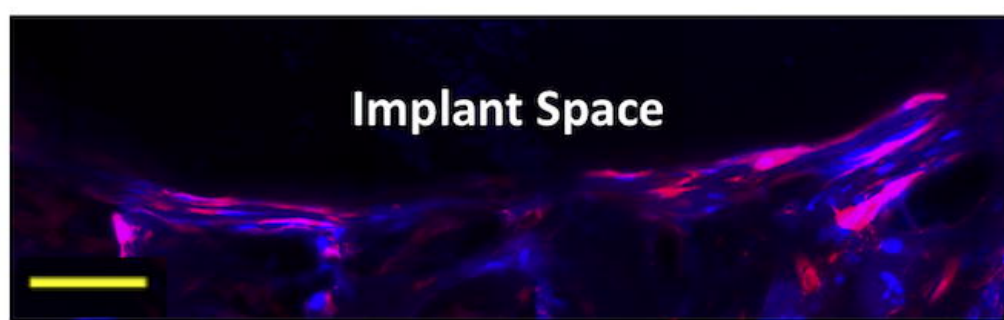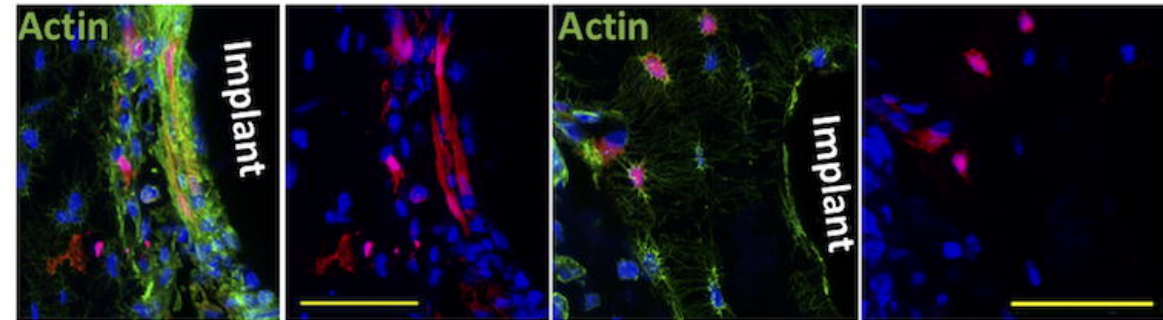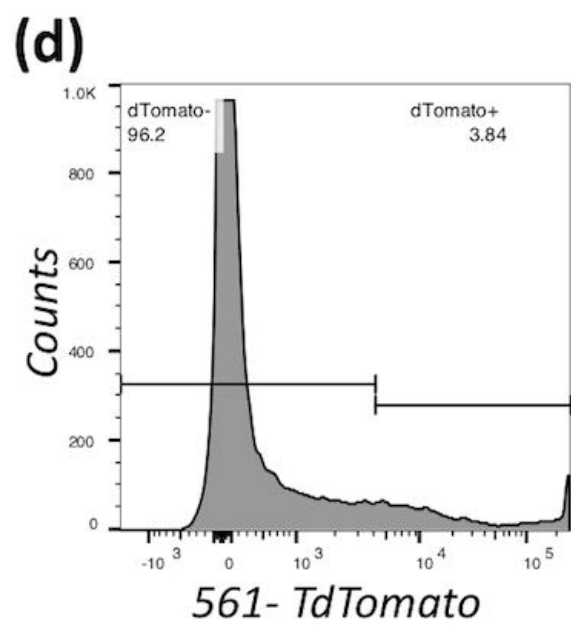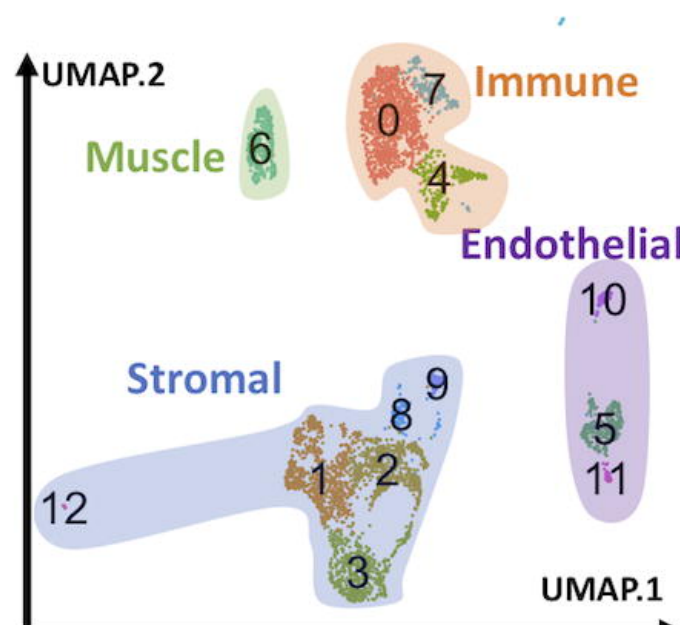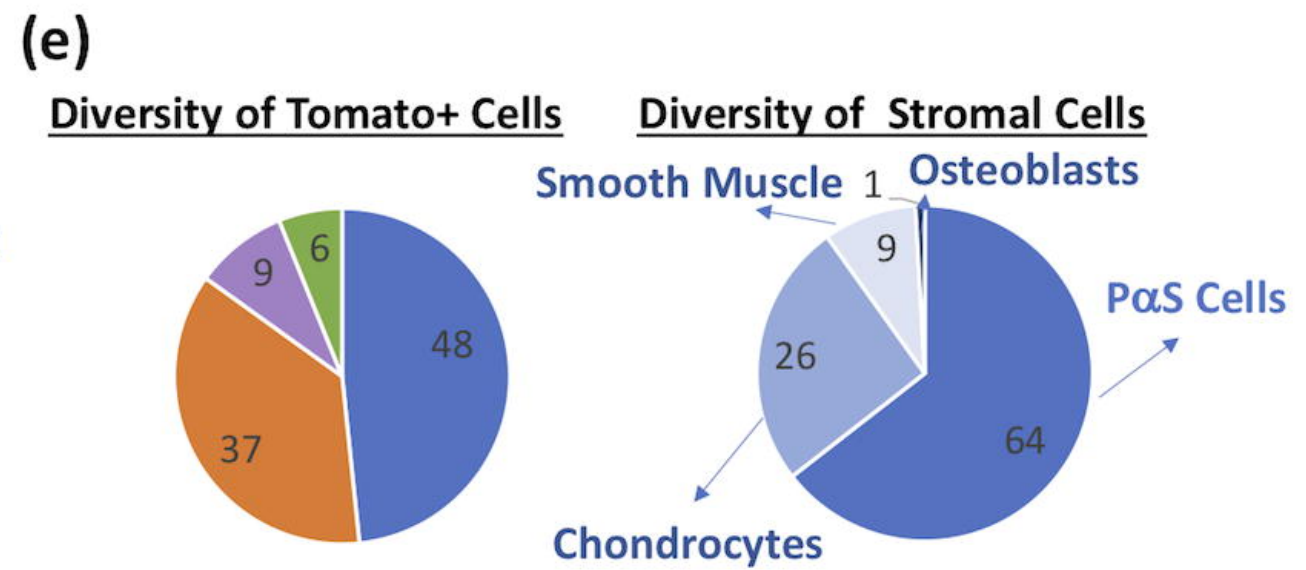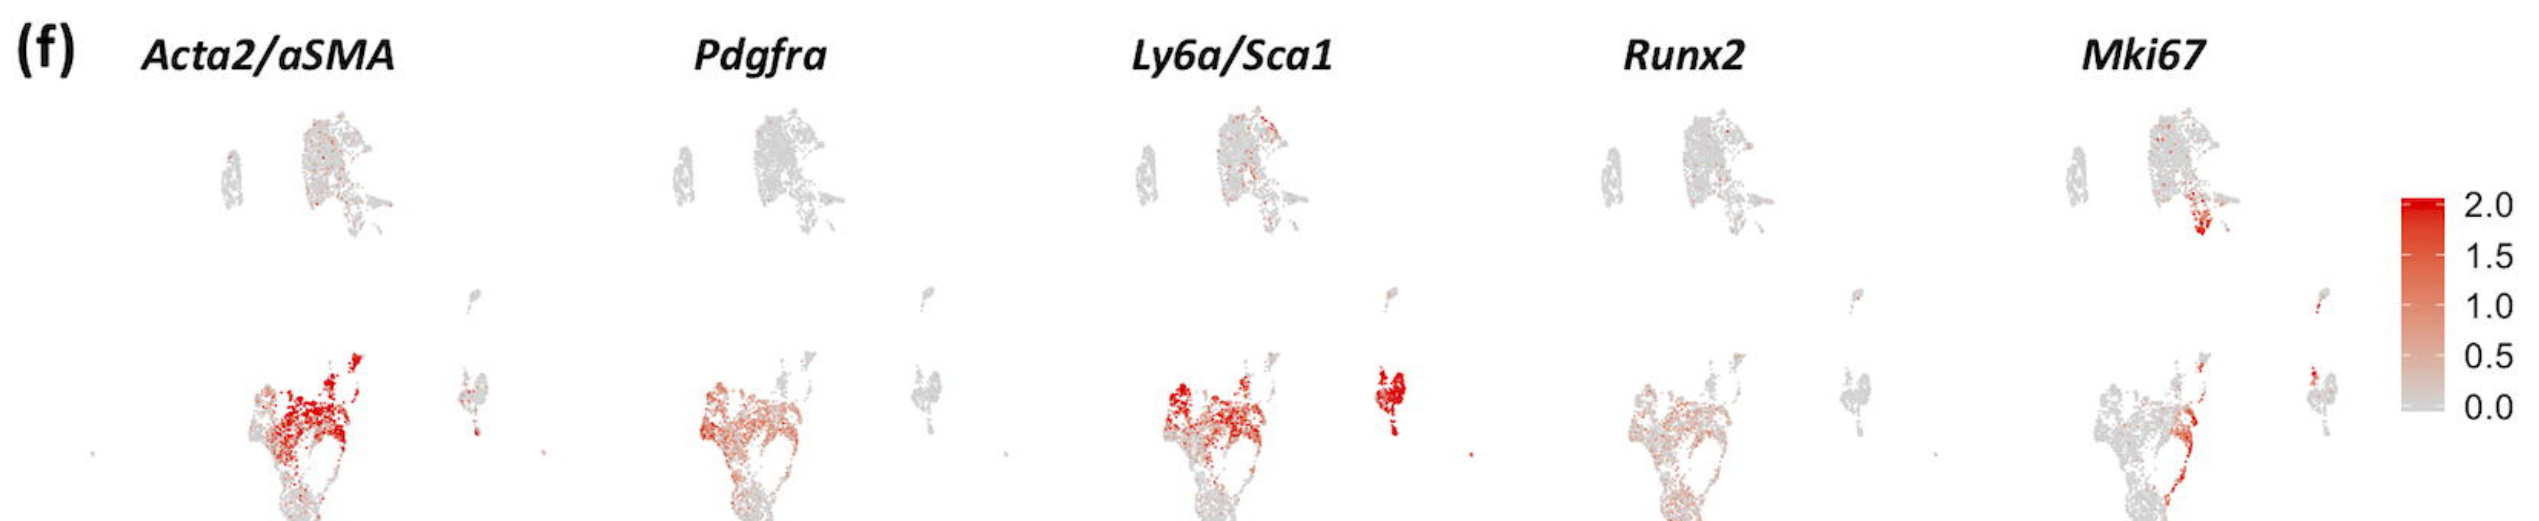



**(a)****Tmem100.creERT2; R26.TdTomato**

bioRxiv preprint doi: <https://doi.org/10.1101/2020.08.17.254433>; this version posted August 17, 2020. The copyright holder for this preprint (which was not certified by peer review) is the author/funder, who has granted bioRxiv a license to display the preprint in perpetuity. It is made available under aCC-BY-NC-ND 4.0 International license.

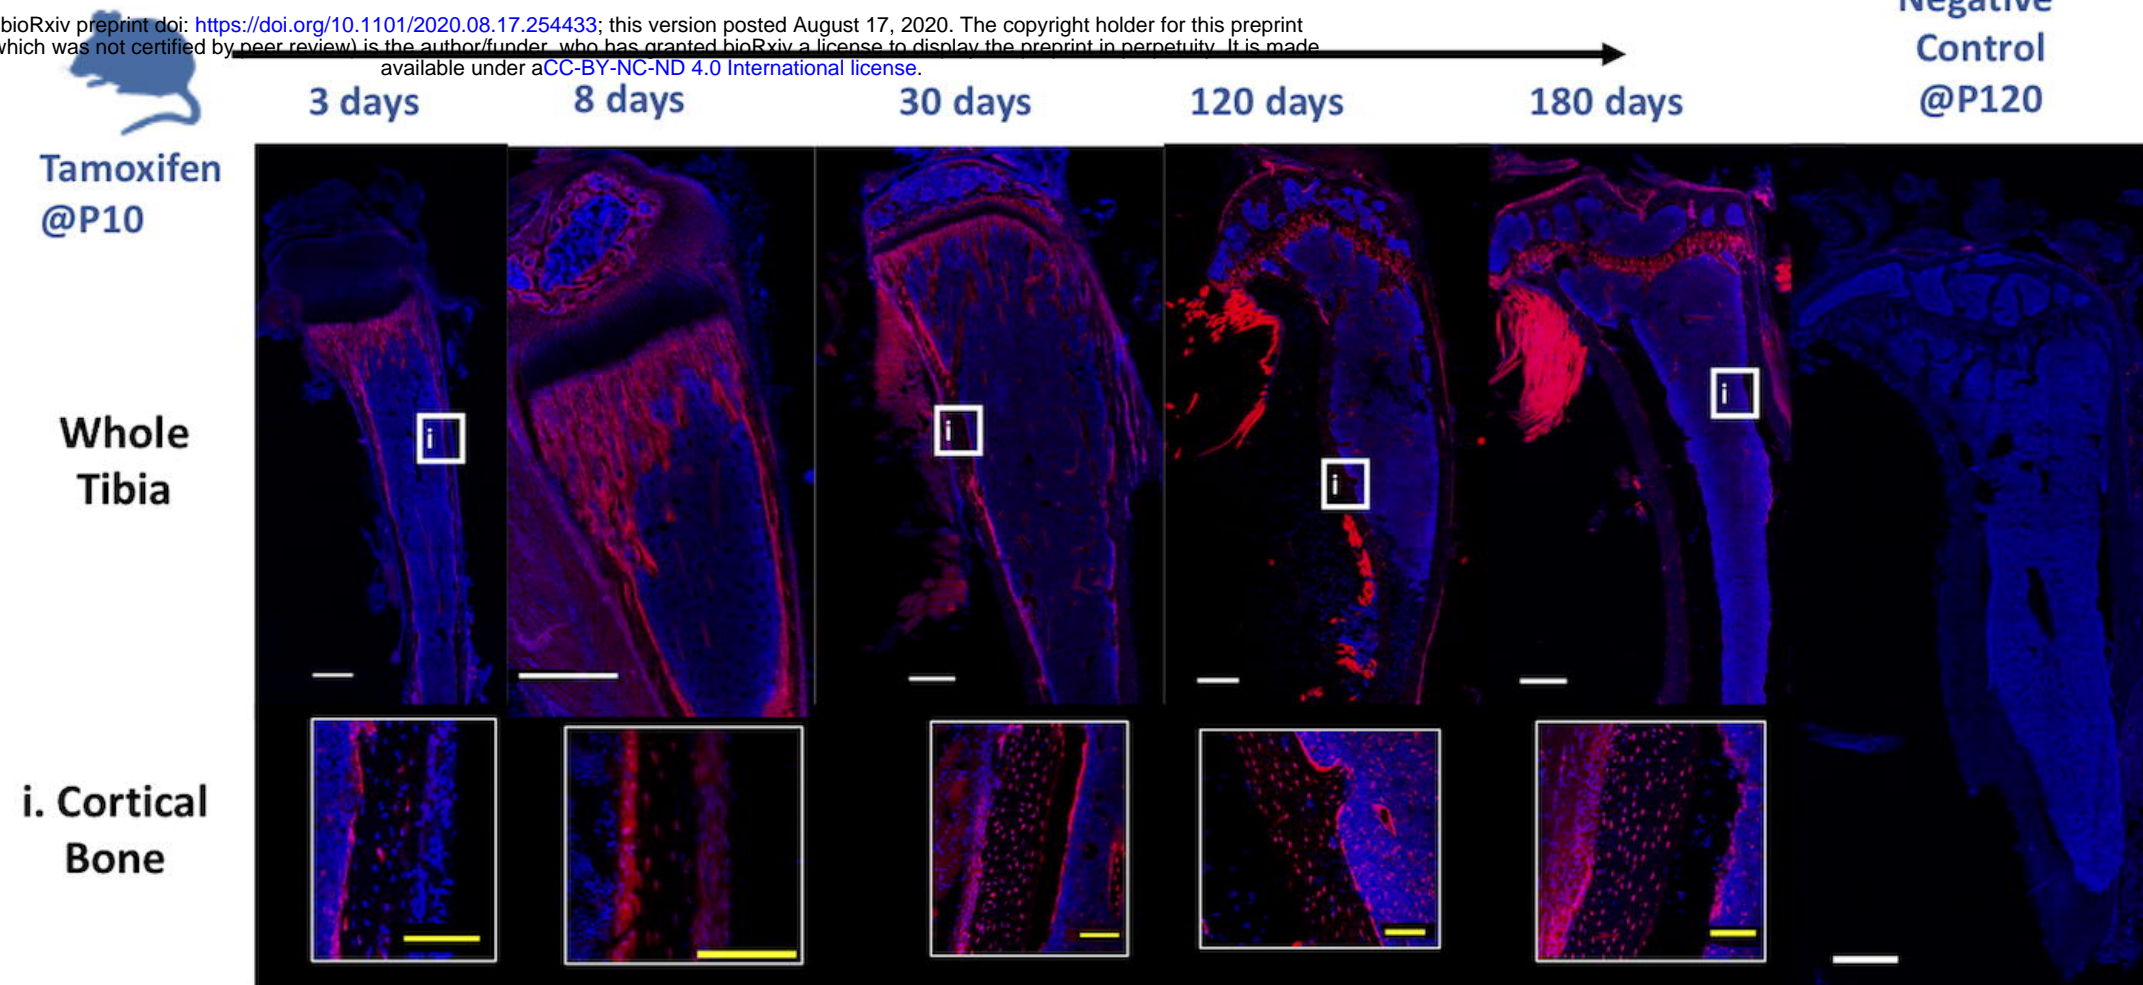**(b)**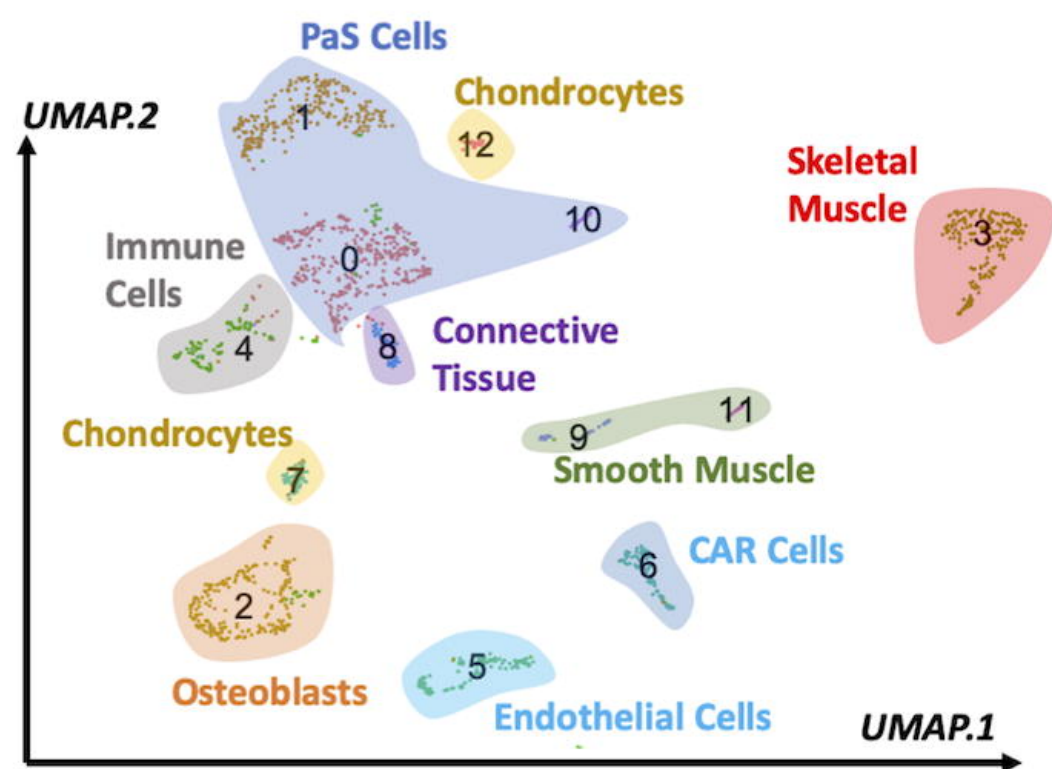**(c)**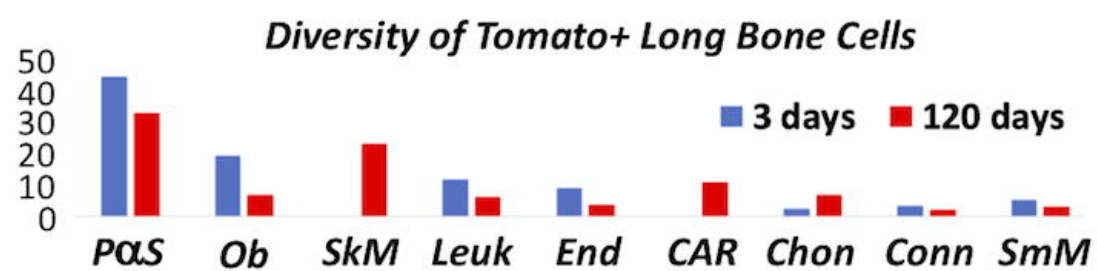**(d)**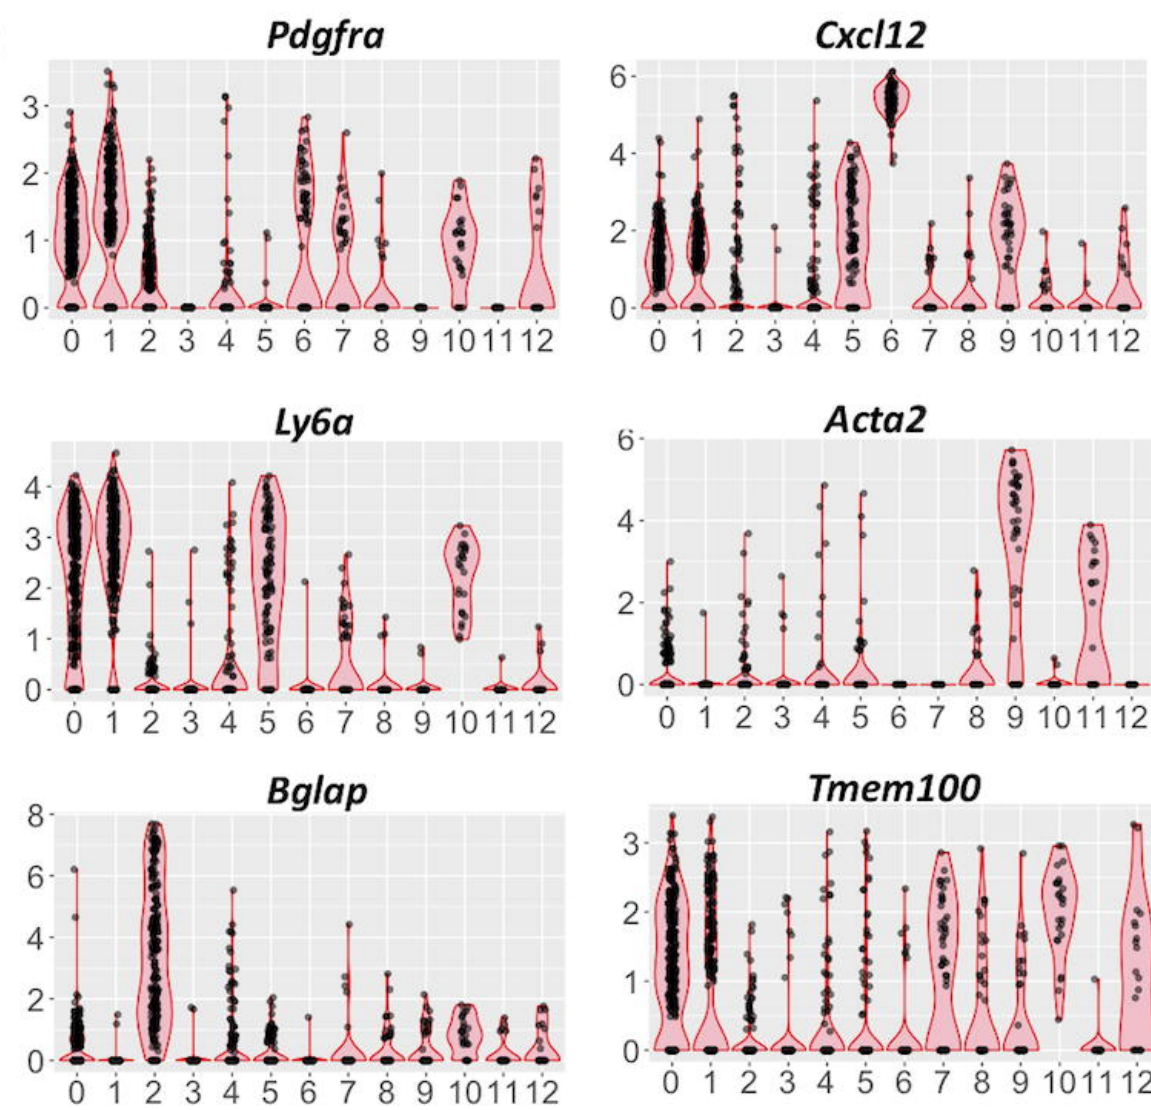



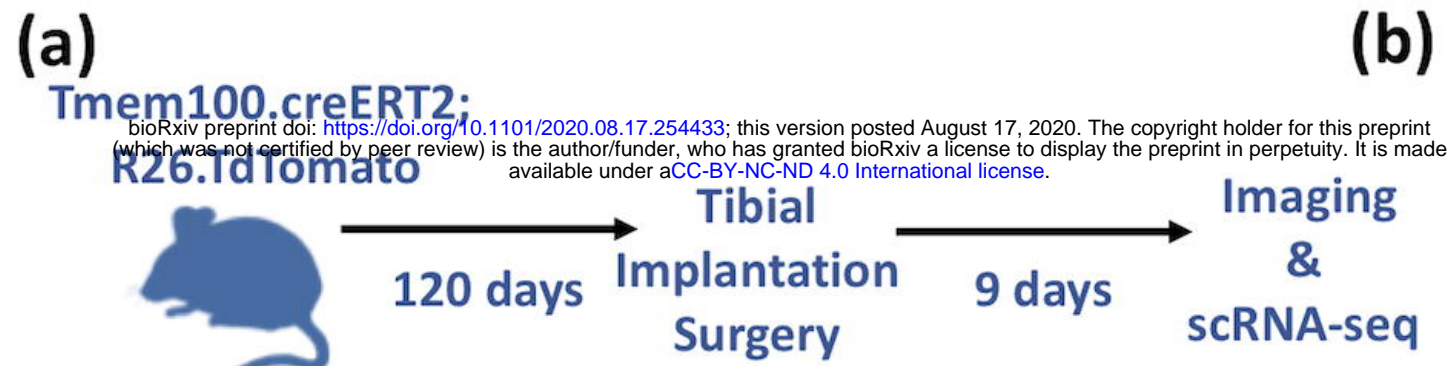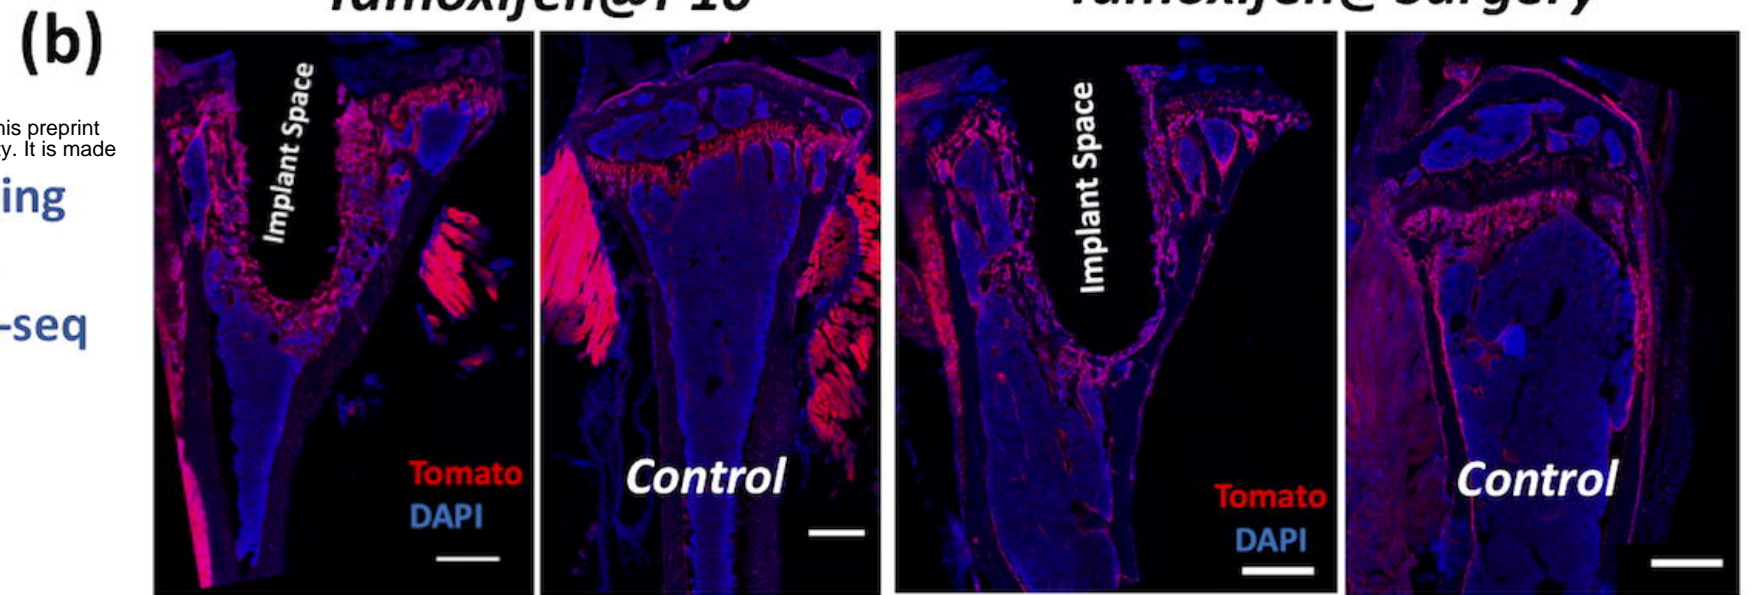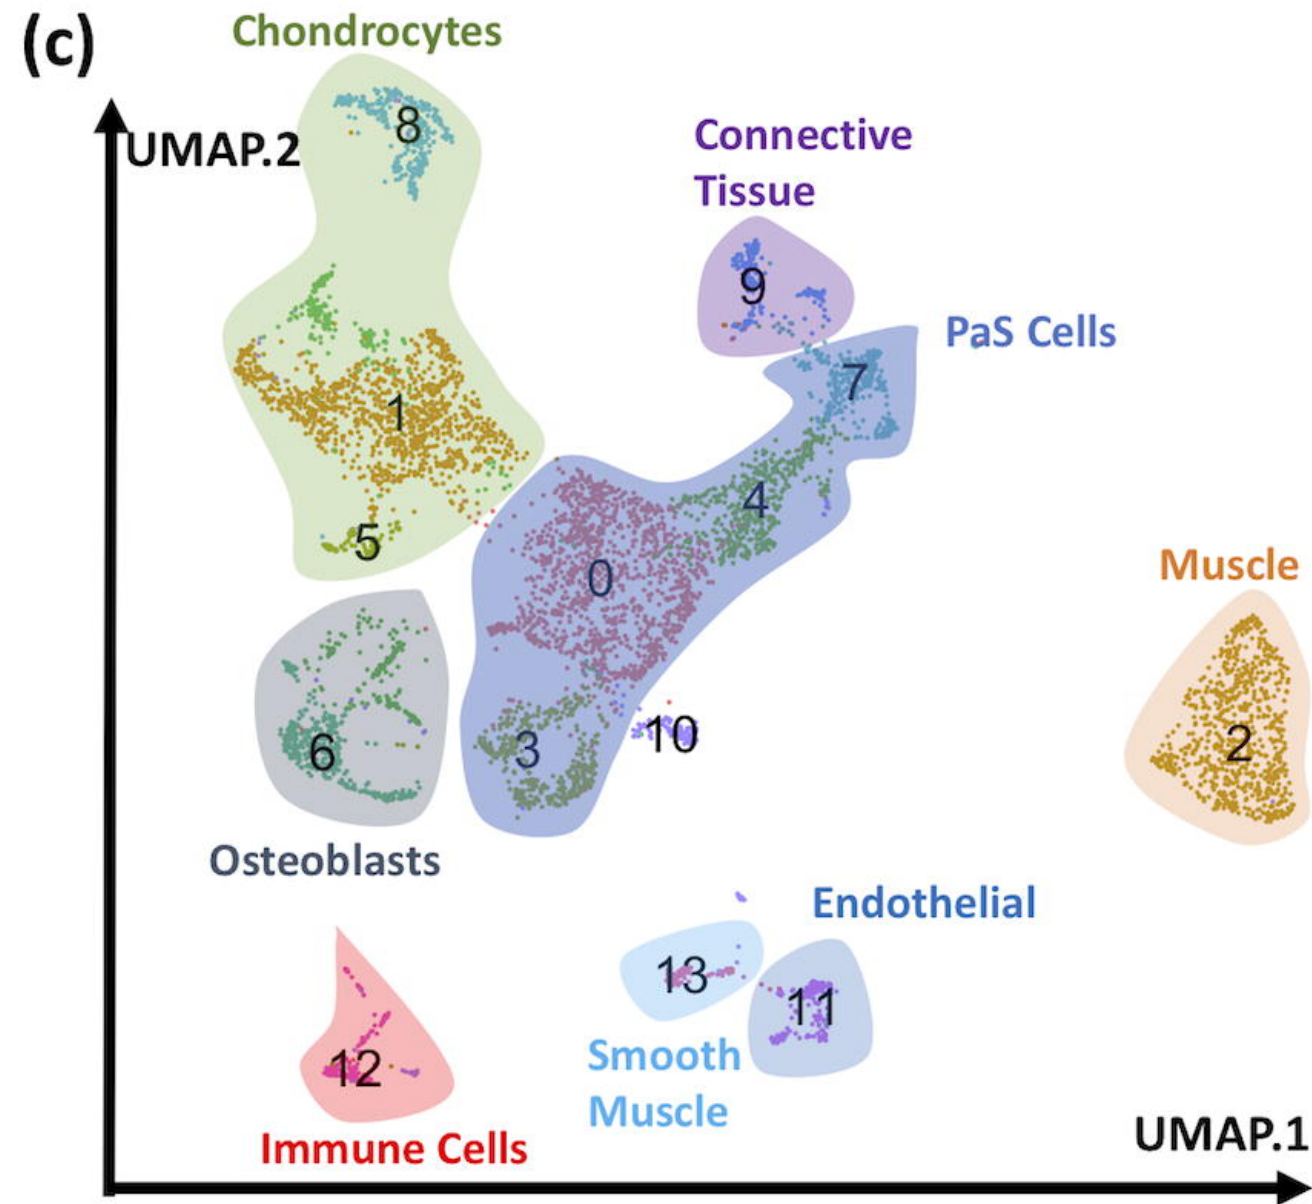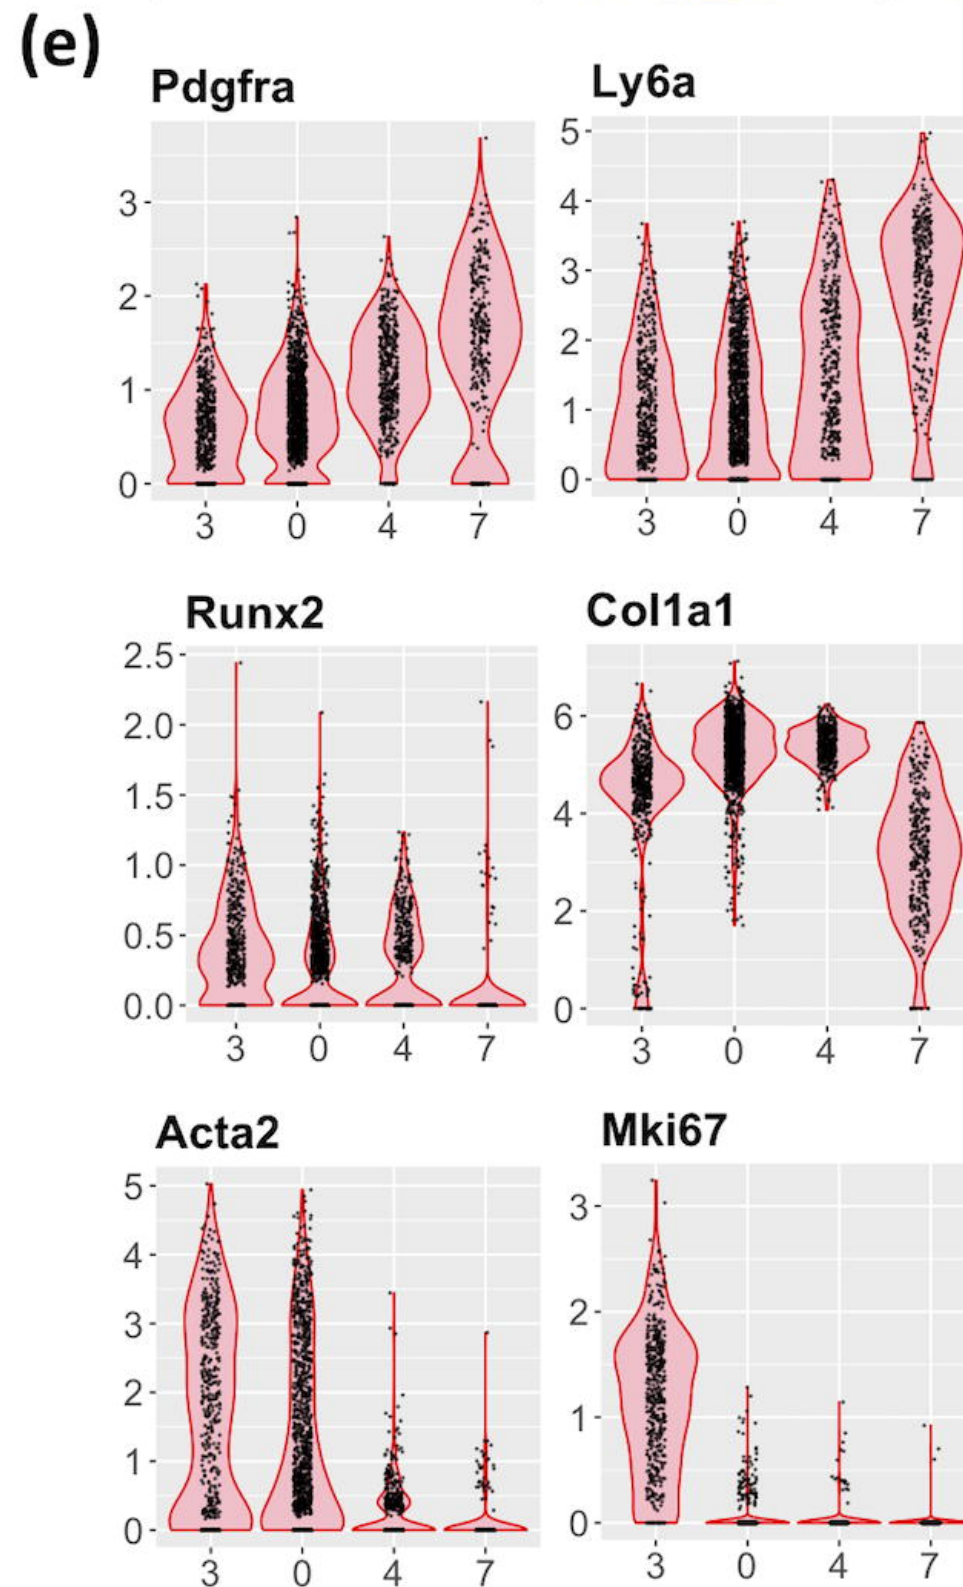

**(f)**

| HALLMARK GENE SET                 | #4 vs #7 | #0 vs #7 | FDR |
|-----------------------------------|----------|----------|-----|
| EPITHELIAL_MESENCHYMAL_TRANSITION | 0        | 0        |     |
| MYC_TARGETS_V1                    | 0.036    | 0        |     |
| UNFOLDED_PROTEIN_RESPONSE         | 0.009    | 0        |     |
| MTORC1_SIGNALING                  | 0.387    | 0.002    |     |
| GLYCOLYSIS                        | 0.017    | 0.001    |     |
| PROTEIN_SECRETION                 | 0.014    | 0.003    |     |
| ANGIOGENESIS                      | 0.001    | 0.006    |     |
| PI3K_AKT_MTOR_SIGNALING           | 0.312    | 0.006    |     |
| HYPOXIA                           | 0.014    | 0.006    |     |
| OXIDATIVE_PHOSPHORYLATION         | 0.979    | 0.009    |     |
| MYC_TARGETS_V2                    | 0.375    | 0.028    |     |
| TNFA_SIGNALING_VIA_NFKB           | 0.014    | 0.596    |     |
| UV_RESPONSE_UP                    | 0.025    | 0.358    |     |

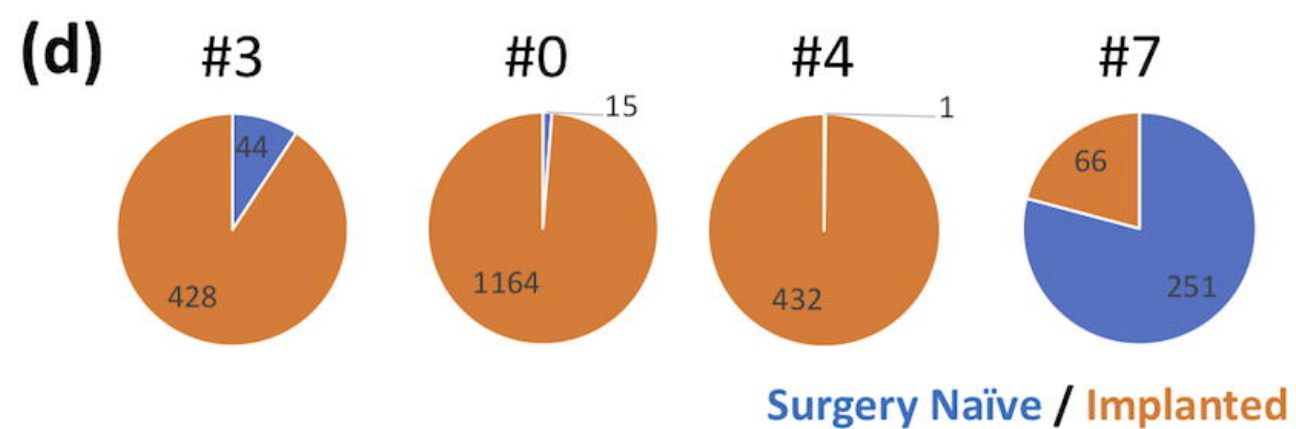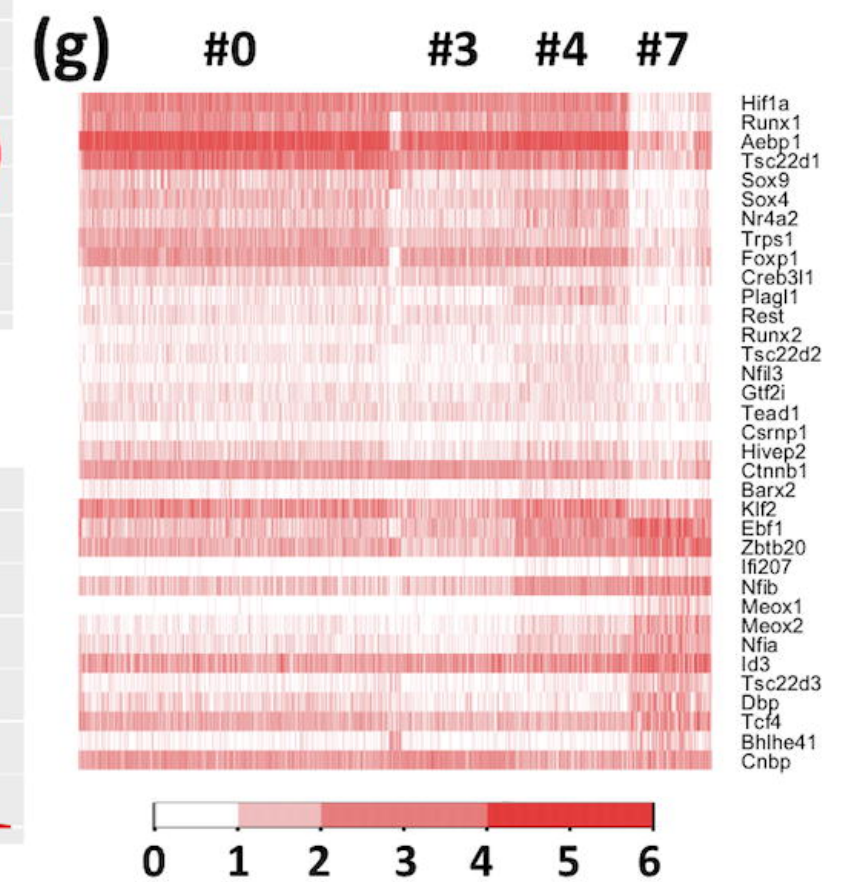

Source: http://biorxiv.org/content/10.1101/2020.08.17.254433v1.full.pdf
